# Supplementary material for: A functional screen identifies miRNAs that inhibit DNA repair and sensitize prostate cancer cells to ionizing radiation
Source: PubMed Central journal article supplement (PMC4417178; doi:10.1093/nar/gkv273), 2015-04-06
Supplement: supp_gkv273_nar-03594-d-2014-File009.pdf [file supp_gkv273_nar-03594-d-2014-File009.pdf]

## **Supporting Information**

### **Methods**

#### **Cell cycle analysis**

Prostate cancer cells were transfected with 20 nM of control or radiation sensitizing miRNAs and then treated with 4 Gy of IR 48 h post transfection. Cells were harvested 6, 16 or 30 h after IR and suspended in PBS. Ice-cold methanol:acetone (1:1) was added dropwise with intermittent vortexing and cells were stored overnight at  $-20^{\circ}\text{C}$ . Cells were washed with cold PBS and incubated with PI/RNase Staining Buffer (BD Pharmingen, Franklin Lakes, NJ) for 15 min. DNA content was measured using a FACSCalibur flow cytometer and analyzed using Cell Quest software (BD Biosciences, Franklin Lakes, NJ). Doublet discrimination was accomplished by gating on forward scatter-H v. FL2A and FL2A v. FL2-H. At least 12,000 events were collected and analyzed in each sample.

#### **Supplementary Figure 1**

##### **The radiation sensitization efficacy of DNAPK siRNA in LNCaP-MLuc cells.**

DNAPK siRNA was used as a positive control for each 96 well LNCaP-MLuc plate of the high throughput miRNA radiosensitivity screening. Two days before IR, each plate contained wells

which were transfected with either DNAPK siRNA or control. On day 0, plates were irradiated at 4 Gy or remained untreated. On day 11, the cell viability and radiation sensitivity were determined by the MLuc viability assay (RLU; Relative Light Units). (A) The MLuc activity of each group is presented (mean  $\pm$  S.E., n=132). (B) Normalized Relative cell viability after IR (mean  $\pm$  S.E., n=132) is presented as the relative MLuc activity of irradiated cells normalized by that of non-irradiated cells. \*, P < 0.05.

### **Supplementary Figure 2**

#### **The reproducibility of the high-throughput functional miRNA screening.**

The high-throughput miRNA screening for cell growth and IR response was performed with duplicate wells for each miRNA and treatment condition, forming Group 1 and Group 2. The correlation of viable cell number for each miRNA, as measured by relative MLuc activity normalized by control in Group 1 and Group 2, is plotted for the (A) non-irradiated and (B) IR samples. The linear correlation coefficient ( $R^2$ ) between the two groups is noted.

### **Supplementary Figure 3**

#### **Radiosensitization by miRNAs from individual miRNA families.**

The radiation sensitization of LNCaP-MLuc cells from the high-throughput miRNA screen for

the individual miRNA families miR-15/16, miR-1/133, and miR-106b are highlighted. The % cell viability (mean  $\pm$  S.E.,  $n \geq 4$ ) following IR (4Gy) is presented by the ratio of MLuc activity for irradiated cells relative to non-irradiated cells for each miRNA on day 11. Control miRNA is noted by the dash line.

#### **Supplementary Figure 4**

##### **miRNA mediated radiation sensitization in PC3 cells.**

PC3 Clonogenic Assay. PC3 cells were transfected with 20 nM of miR-890, miR-744-3p or control miRNA (cel-miR-239b) and grown for 2 days, after which cells were irradiated at the indicated doses. The cells were grown for 14 days and colonies with greater than 30 cells were scored, and surviving fraction was calculated (mean  $\pm$  S.D.,  $n=3$ ). \*,  $P < 0.05$  relative to control. DMF; Dose Modifying Factor.

#### **Supplementary Figure 5**

##### **DSB repair delay by radiation sensitizing miRNAs in PC3 cells.**

(A) Immunofluorescent staining of  $\gamma$ -H2AX foci in PC3 cells transfected with control, miR-890 or miR-744-3p miRNAs in untreated (0 Gy) or 1 and 8 h after IR (4 Gy) treatment. Nuclei were stained with DAPI. (B) Quantification of  $\gamma$ -H2AX foci. The percentage of cells

containing  $>10$   $\gamma$ -H2AX foci (mean  $\pm$  S.E.,  $n \geq 3$ ) is reported for each time point and treatment group. \*,  $P < 0.05$ . (C) Comet assay of PC3 cells transfected with control, miR-890 or miR-744-3p miRNAs which were either untreated (0 Gy) or 4 h after IR (4 Gy) treatment. (D) Quantification of the average tail moment (mean  $\pm$  S.E.,  $n \geq 50$ ) is reported for each miRNA and treatment condition. \*,  $P < 0.05$ .

### **Supplementary Figure 6**

#### **IR-induced cell cycle checkpoint control.**

(A) Cell cycle analysis in DU145 and PC3 cells transfected with control, miR-890 or miR-744-3p miRNAs in untreated (0 h) or 6, 16 and 30 h after IR (4 Gy) treatment. (B) The cell cycle distribution (G0/G1, S or G2/M) was analyzed for each treatment.

### **Supplementary Figure 7**

#### **The effect of WEE1 siRNA and miR-890, alone or in combination, on IR therapy.**

(A) WEE1 and MAD2L2 knock-down by siRNA for WEE1 (siWEE1), miR-890, or combined siWEE1 and miR-890 in LNCaP cells (10 nM). Western blot of WEE1 and MAD2L2 48 h after transfection. ACTB was used as a control for protein loading (B) IR sensitization potency of siWEE1 and/or miR-890 (0.08-10 nM) in LNCaP-MLuc cells. Relative cell

viability (mean  $\pm$  S.E., n=6) is presented as the MLuc activity after IR (4Gy), as normalized by control miRNA. (C) The calculated IC<sub>50</sub> value of each treatment group, based on relative cell viability after IR.

### **Supplementary Figure 8**

#### **The knock-down efficacy of target genes by miR-890 and MAD2L2 siRNA.**

LNCaP cells were transfected with 20 nM of control, miR-890 mimetics or serial dilutions of MAD2L2 siRNA and were incubated for 48 h. Western blot analyses were performed to detect MAD2L2 and WEE1. ACTB was used as a control for protein loading.

### **Supplementary Figure 9**

#### **Individual DU145 tumor growth curves.**

(A-E), Subcutaneous DU145 tumors were directly injected with PBS, liposomal control miRNA mimetic, or liposomal miR-890 mimetic on day -2. On day 0, animals were divided into groups that received either 6 Gy IR or non-irradiated. Tumors were measured every other day and individual tumor growth curves are reported. (A) PBS (n=3); (B) Control miRNA (n=4); (C) miR-890 (n=5); (D) Control miRNA + IR (n=4); (E) miR-890 + IR (n=4).

### **Supplementary Table 1**

The sequence of siRNAs used in this study.

### **Supplementary Table 2**

The sequence of primers used in this study.

### **Supplementary Table 3**

**Summary of the results of the high-throughput miRNA screening for cell growth and IR response.**

810 miRNA mimetics were transfected into LNCaP-MLuc cells. After two days, cells were irradiated or non-irradiated, and the relative number of surviving cells was quantified by MLuc assay on day 11 post IR. The MLuc activity, representing relative cell viability, for cells transfected with each miRNA was normalized to those transfected with a control miRNA. Results are categorized as cell growth, for non-irradiated samples, and radiation sensitization, for irradiated samples. Anti-proliferative miRNAs were defined as those which inhibited cell growth by over 50% without IR. IR sensitizing or IR protective miRNAs were defined as those which increased IR induced-cell death by over 50% or increased cell survival by over 2

fold, respectively, excluding anti-proliferative miRNAs.

#### **Supplementary Table 4**

Radiation sensitizing miRNAs predicted to target radiation sensitizing DDR pathway genes using *in silico* analysis, microRNA.org. The highlighted cells corresponding to the miRNAs with a mirSVR Score < -0.5.

#### **Supplementary Table 5**

Potential DDR pathway genes predicted to be targeted by miR-890 or miR-744-3p using *in silico* analysis, microRNA.org, and corresponding mirSVR scores.

# Supplementary Figure 1

## A

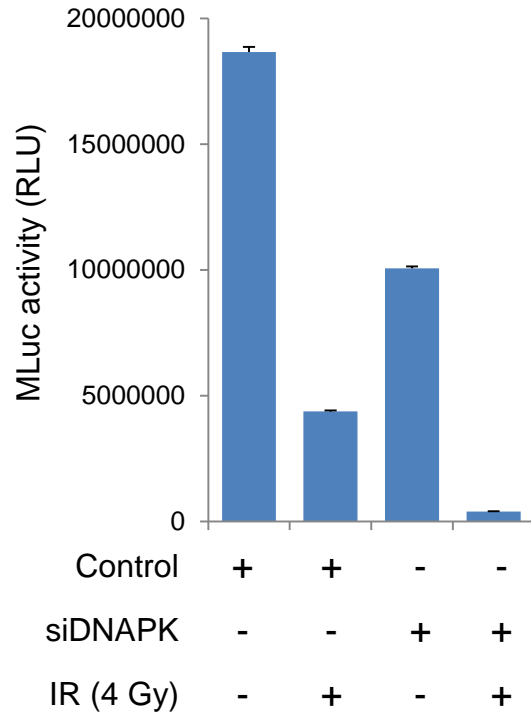

## B

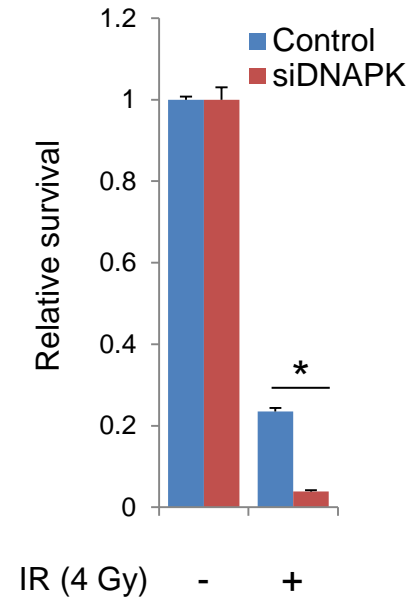



# Supplementary Figure 2

A

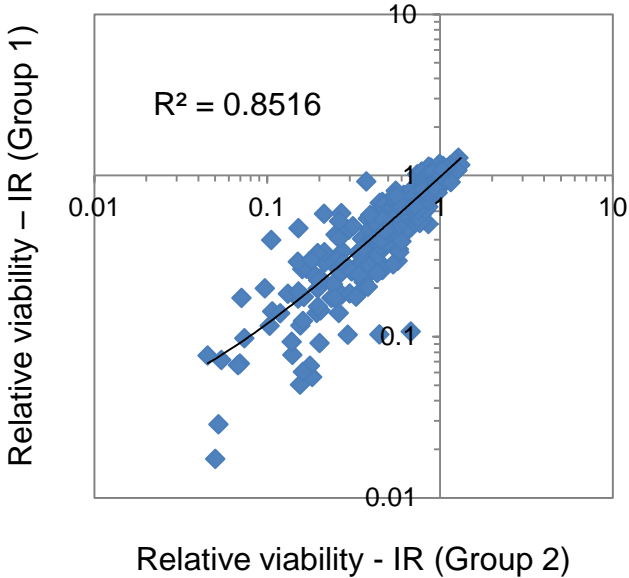

B

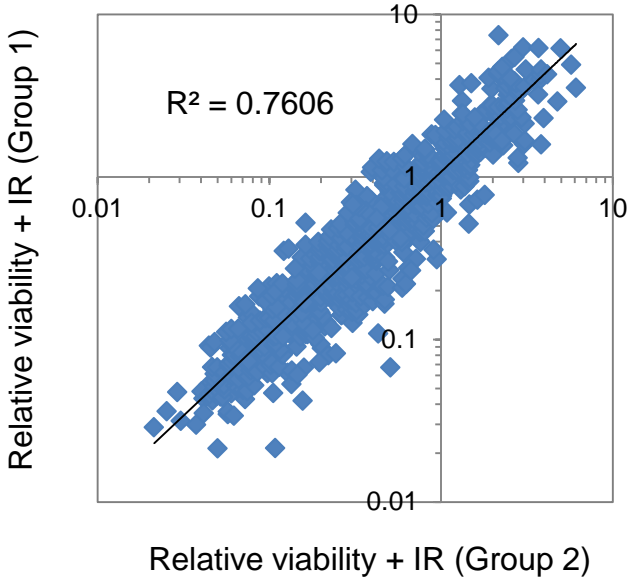

# Supplementary Figure 3

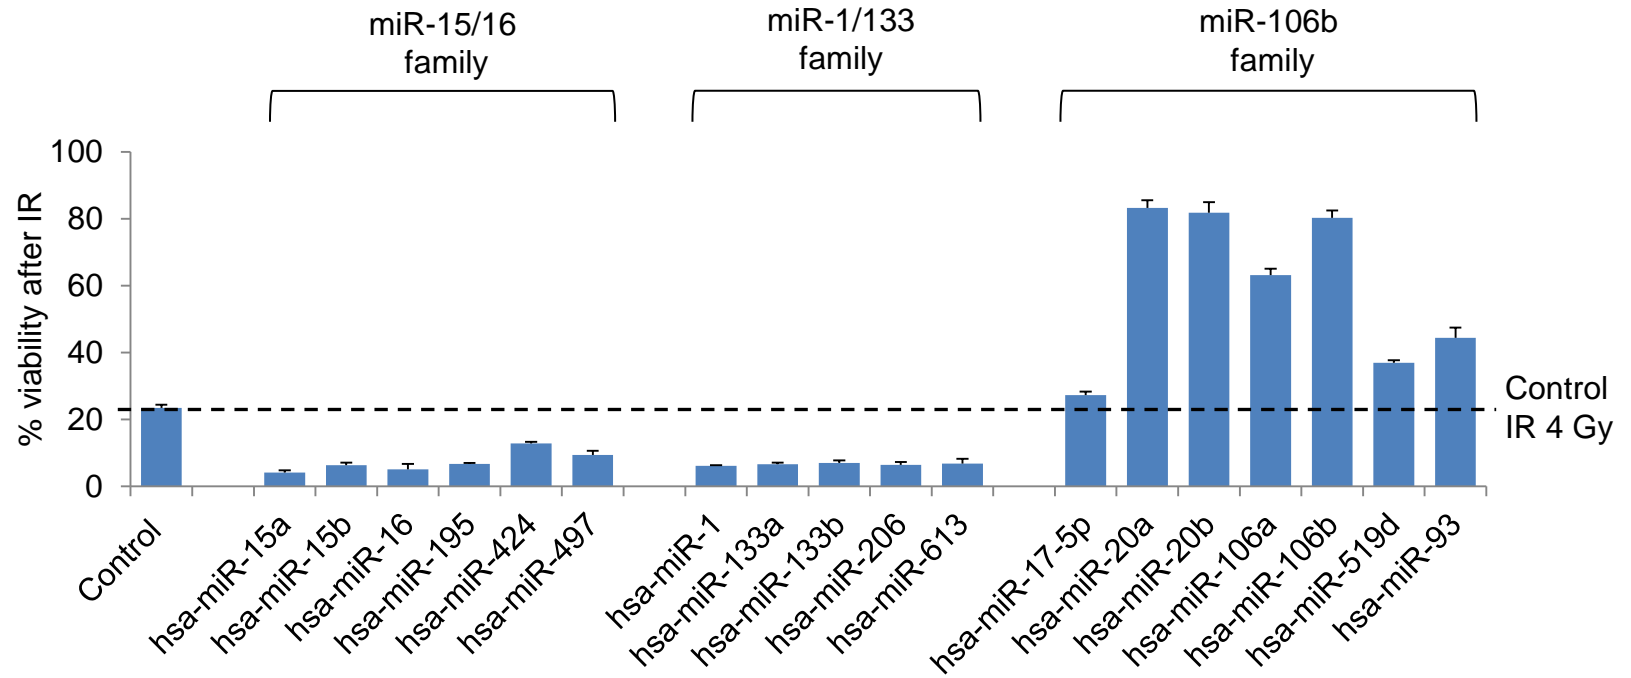

# Supplementary Figure 4

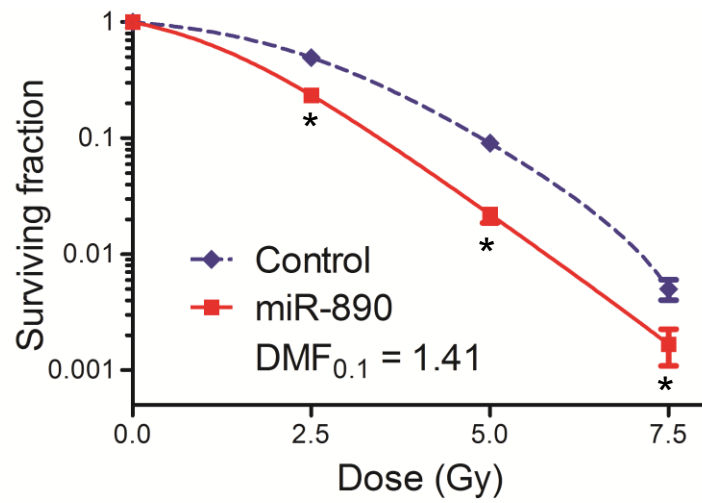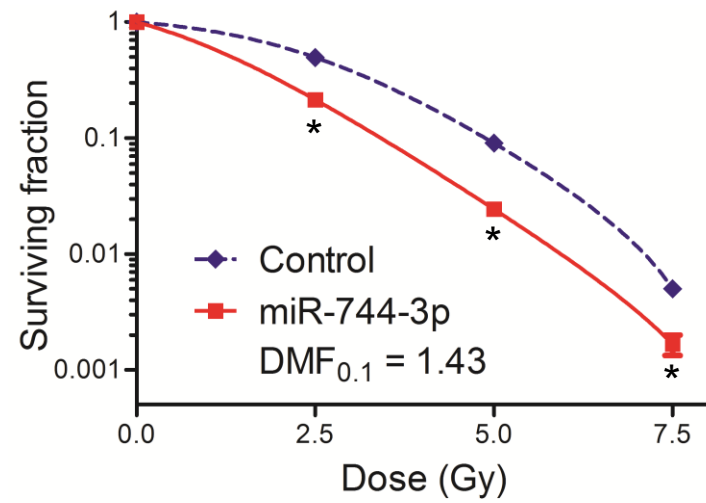

# Supplementary Figure 5

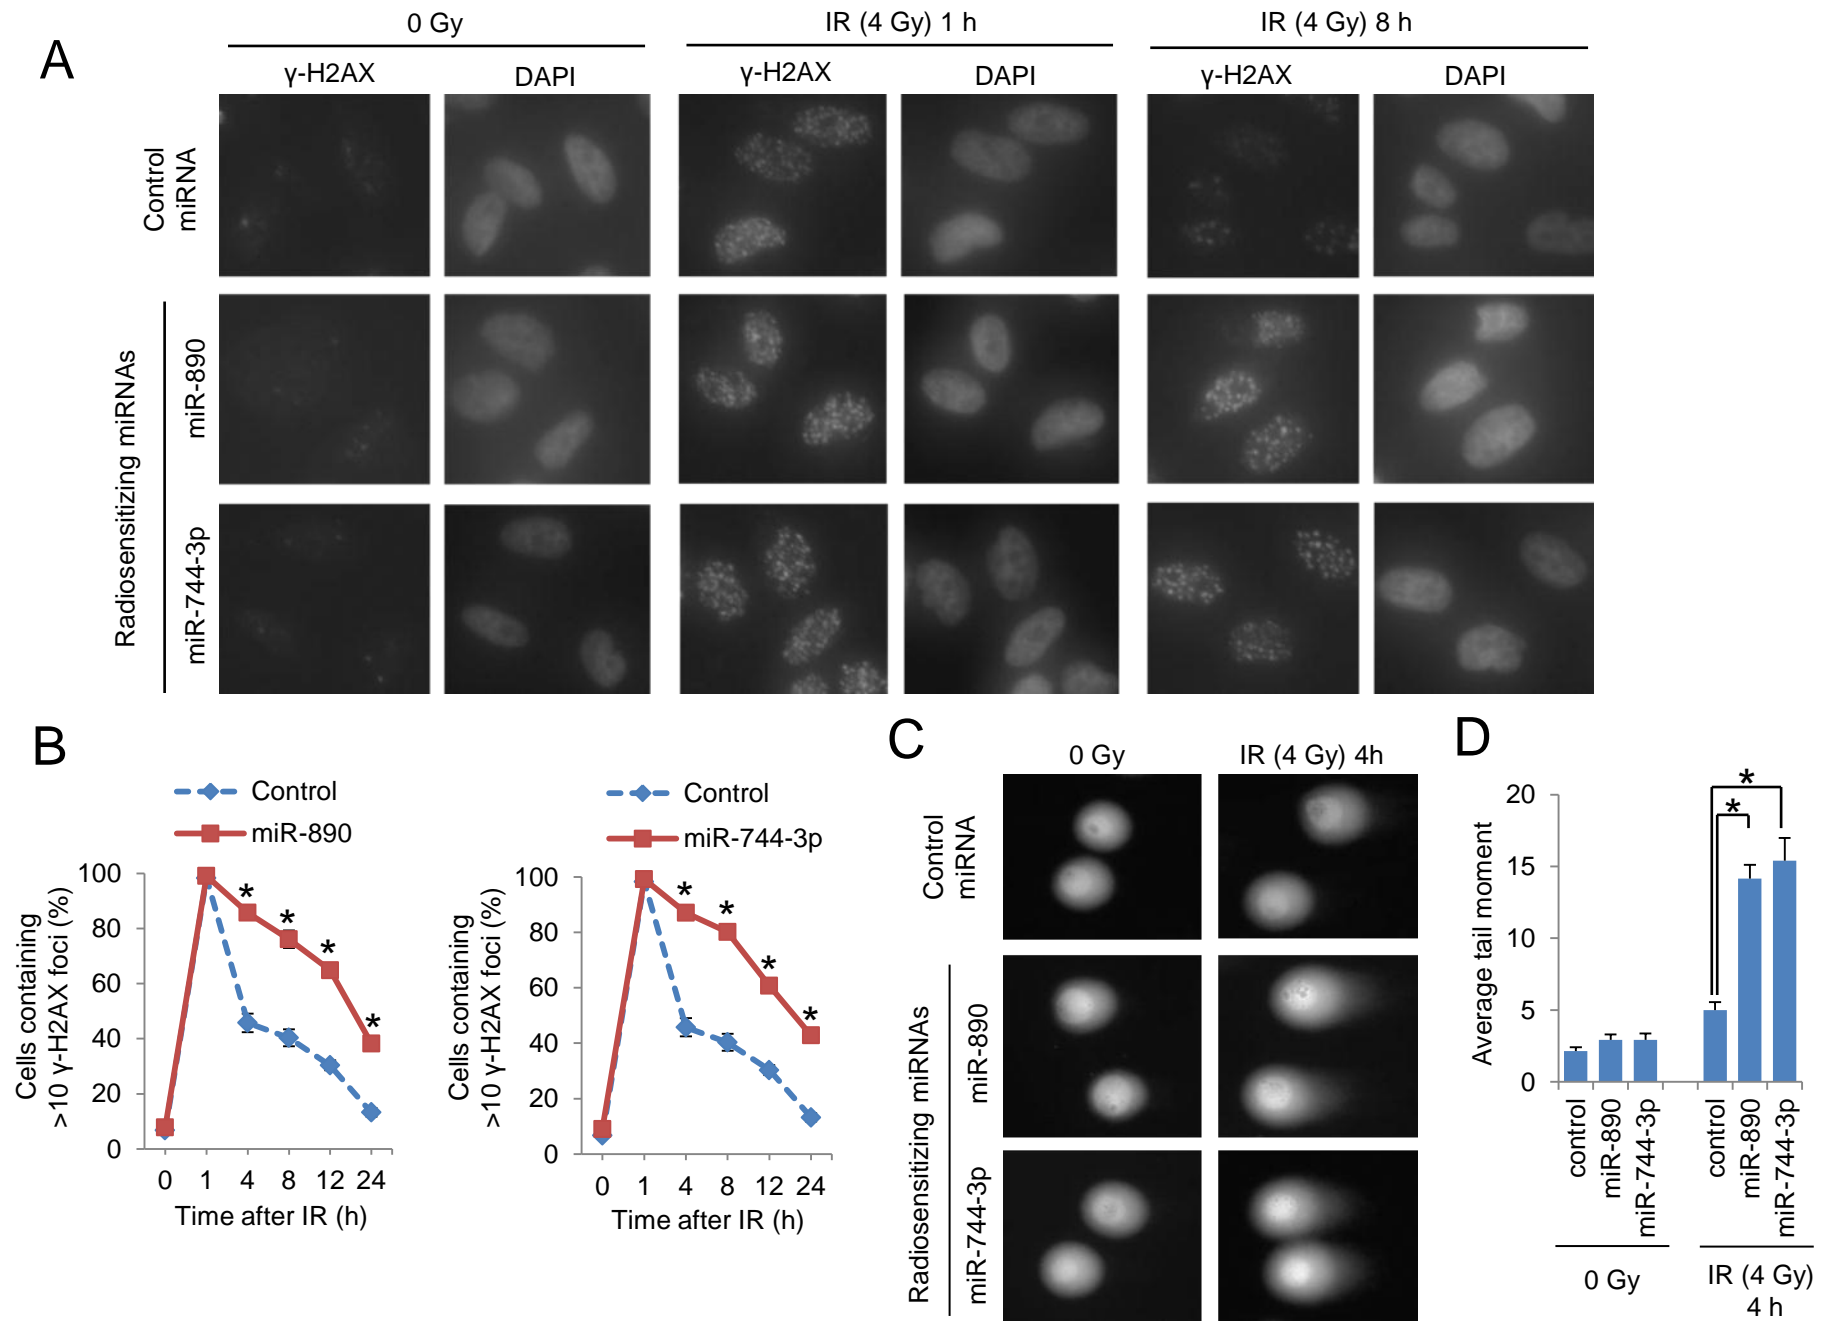

# Supplementary Figure 6

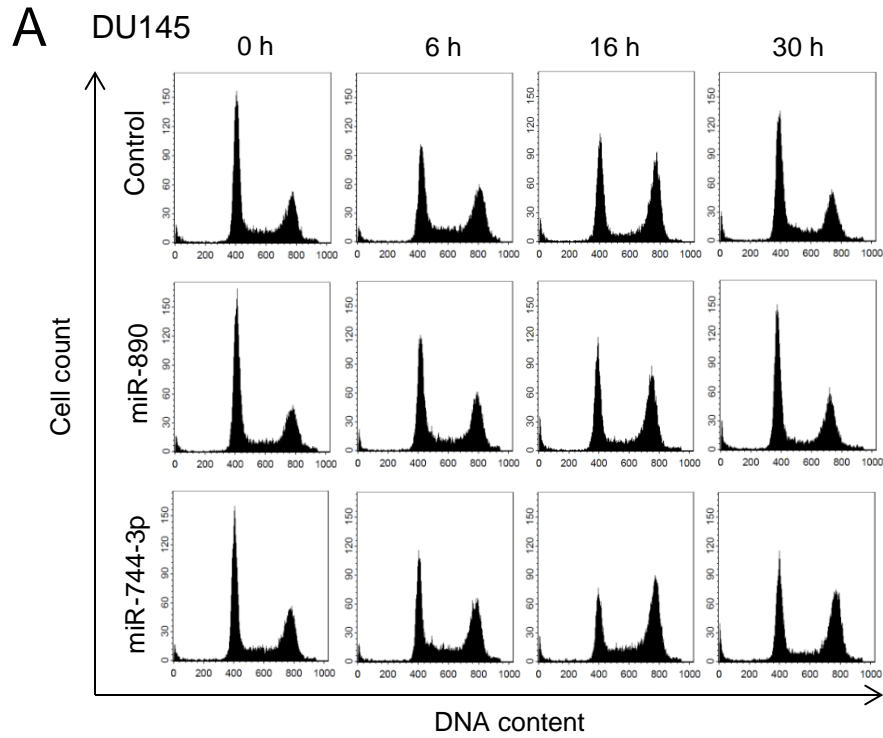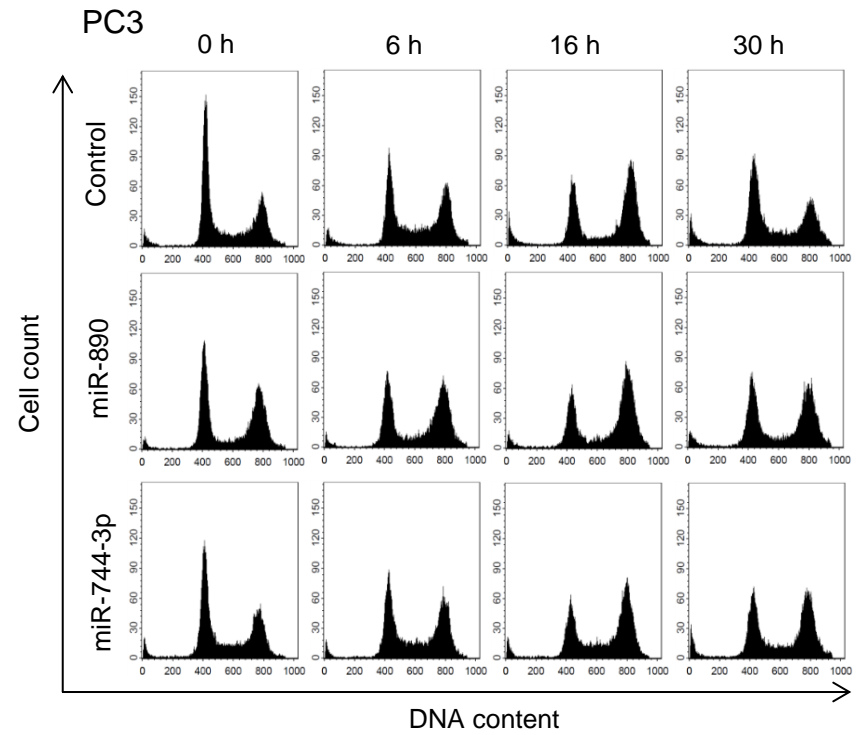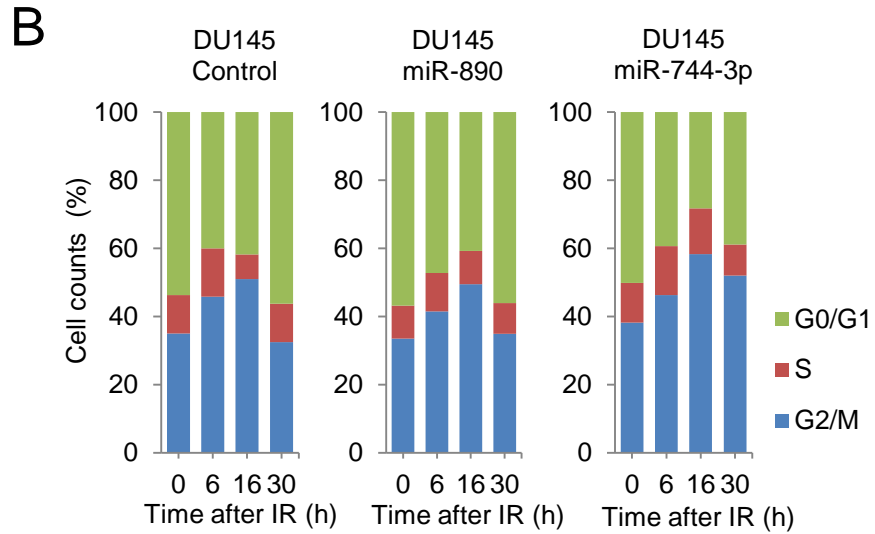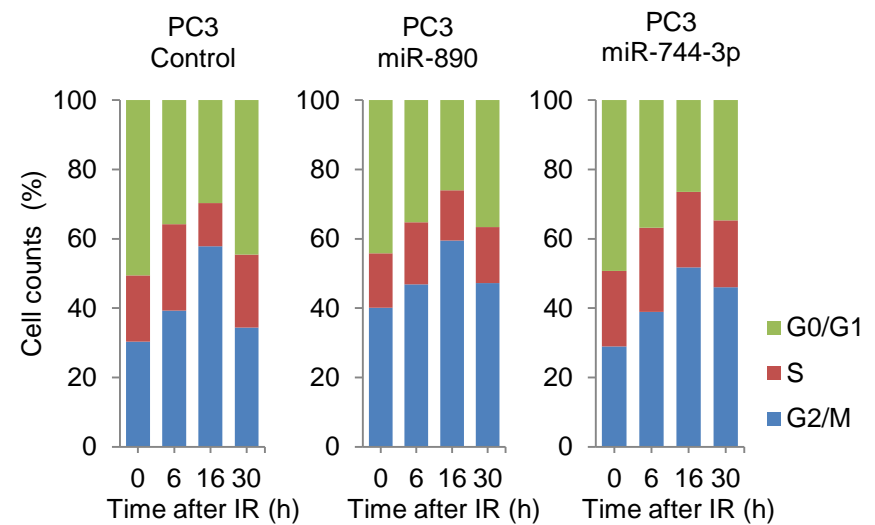

# Supplement Figure 7

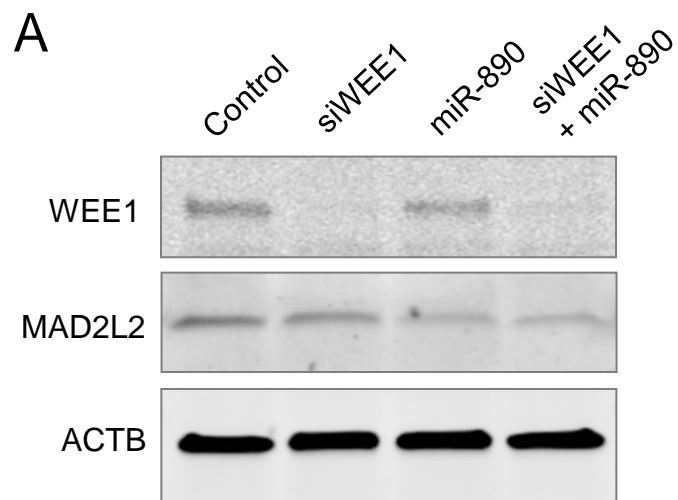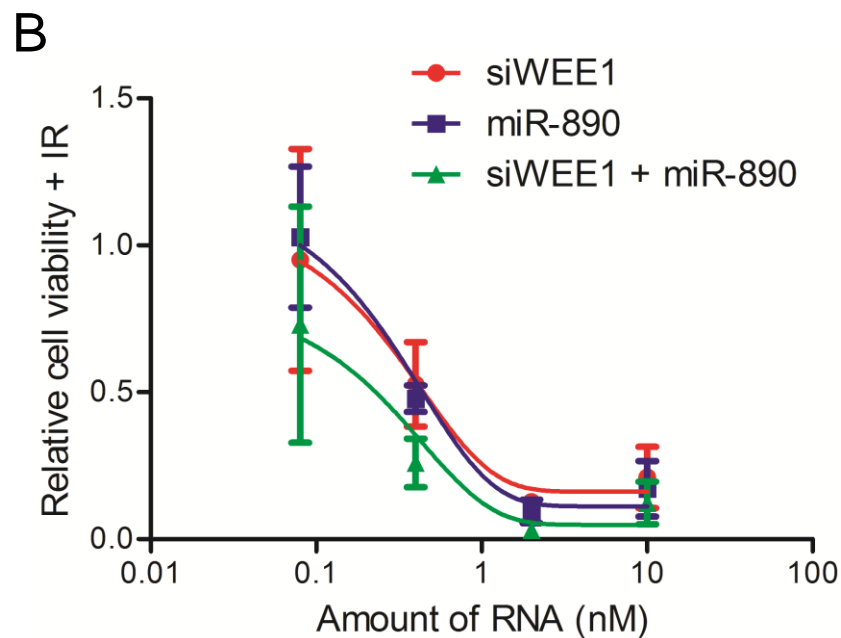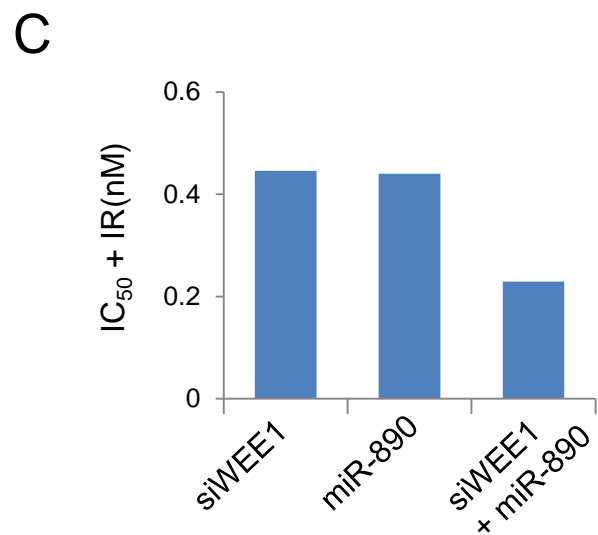

# Supplementary Figure 8

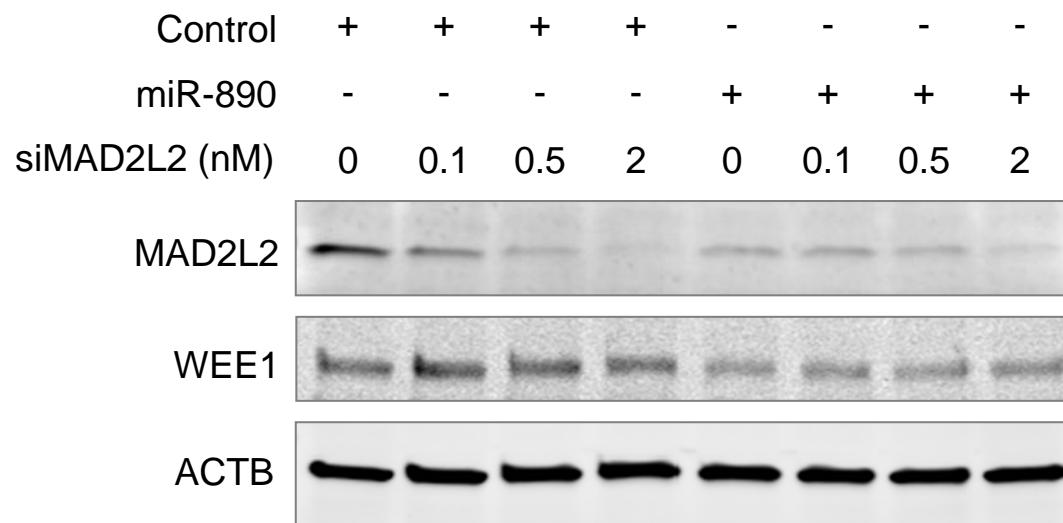

# Supplementary Figure 9

A

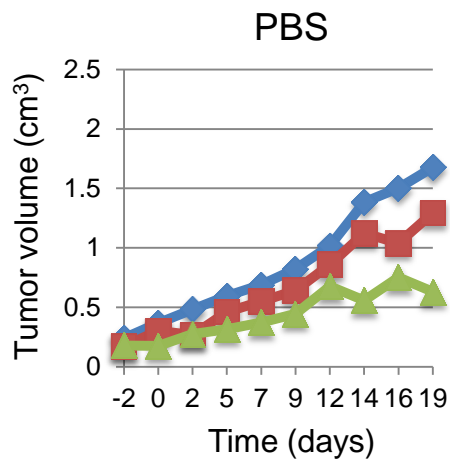

B

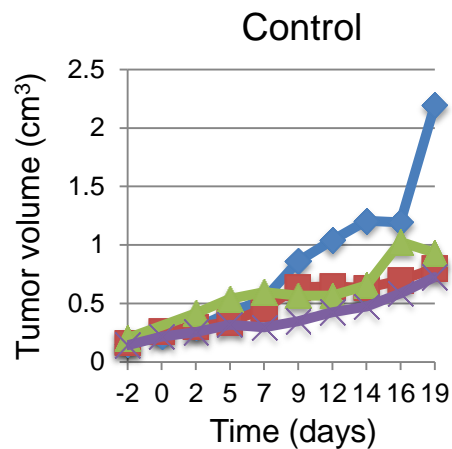

C

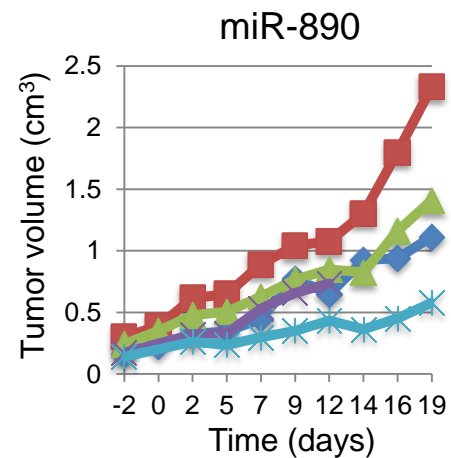

D

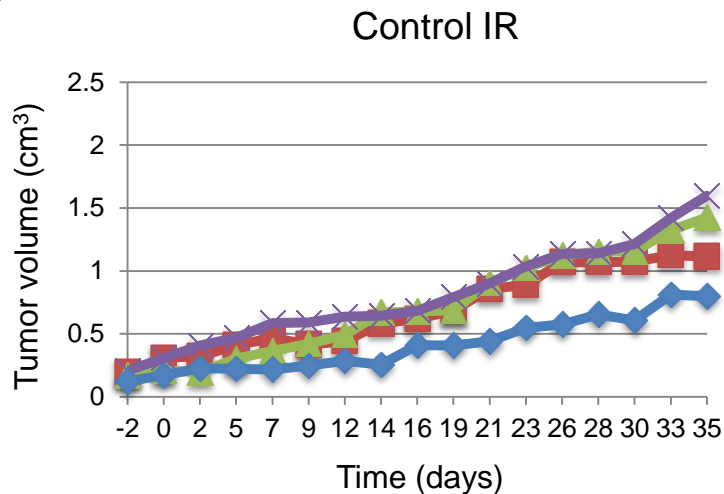

E

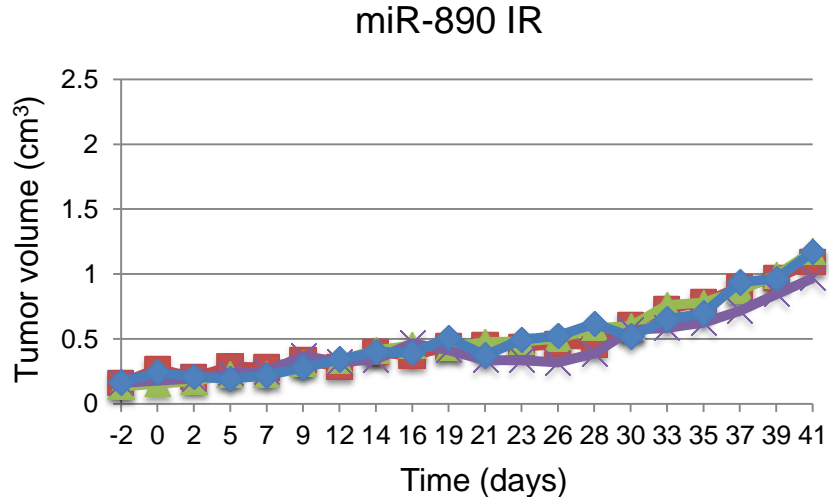



**Supplementary Table 1.** The sequence of siRNAs used in this study.

| siRNA  |                        |                       |
|--------|------------------------|-----------------------|
| Name   | sense                  | anti-sense            |
| DNAPK  | UUCGGCUAACUCGCCAGUUUA  | UAAACUGGCGAGUUAGCCGAA |
| MAD2L2 | CACCCGGAGCUGAAUCAGUAU  | AUACUGAUUCAGCUCCGGGUG |
| WEE1   | CACTGGTAAAGCATTTCAGTAT | ATACTGAATGCTTTACCAGTG |

**Supplementary Table 2.** The sequence of primers used in this study.

| Primers                                       |                                                      |                                                        |
|-----------------------------------------------|------------------------------------------------------|--------------------------------------------------------|
| Primers for 3'UTR cloning                     |                                                      |                                                        |
| Name                                          | Forward                                              | Reverse                                                |
| MAD2L2 3'UTR                                  | GGACTAGTCACCCCACTGATGCCAAAC                          | CCCAAGCTTGGGGCCCCTTTATTGAAAC                           |
| RAD23B 3'UTR                                  | GGACTAGTAAATCAGCTTTTGCAGGTC                          | CCCAAGCTTGCCTCCCACCCAAGTATTTA                          |
| WEE1 3'UTR                                    | GGACTAGTTTCTGGTAATGTCCTTCCCGGA                       | CCCAAGCTTGCTCAGAGTGACTTTTAATATGCCA                     |
| XPC 3'UTR                                     | GGACTAGTTCATCTGTCCGACAAGTTCA                         | CCCAAGCTTGCTCCTTAGTACAGAGAGCTTTATAC                    |
| KU80 3'UTR                                    | GGACTAGTTTTCTGTGGTCTTACTGATC                         | CCCAAGCTTGAGGCAGAGTAATGTGGTAAC                         |
| XLF 3'UTR                                     | GGACTAGTGGTCCCACCCATTGTTGTC                          | CCCAAGCTTGGCAAAGCCTTGCTCCACA                           |
| MCL1 3'UTR                                    | GGACTAGTTTGACTTTTAACCAACCACCACCA                     | CCCAAGCTTGACTGGCCACTTTCCTGTTCTCA                       |
| Primers for mutant pMIR-3'UTR reporter vector |                                                      |                                                        |
| Name                                          | Forward                                              | Reverse                                                |
| Mut-MAD2L2                                    | CTGCATGGCTGCCCTGATTTAGAGTGCTCTTATCGC<br>CTC          | GAGGCGATAAGAGCACTCTAAATCAGGGCAGCCATGCA<br>G            |
| Mut-RAD23B                                    | CTAGAATTTACAGTCTCTGTTTCATGTAGACTGGA<br>TAATGGCTTTGTG | CACAAAGCCATTATCCAGTGTCTACATGAAACAGAGACT<br>GTAAATTCTAG |

**Supplementary Table 3. Summary of the results of the high-throughput miRNA screening for cell growth and IR response.** 810 miRNA mimetics were transfected into LNCaP-MLuc cells. After two days, cells were irradiated or non-irradiated, and the relative number of surviving cells was quantified by MLuc assay on day 11 post IR. The MLuc activity, representing relative cell viability, for cells transfected with each miRNA was normalized to those transfected with a control miRNA. Results are categorized as cell growth, for non-irradiated samples, and radiation sensitization, for irradiated samples. Anti-proliferative miRNAs were defined as those which inhibited cell growth by over 50% without IR. IR sensitizing or IR protective miRNAs were defined as those which increased IR induced-cell death by over 50% or increased cell survival by over 2 fold, respectively, excluding anti-proliferative miRNAs.

| MicroRNA        | miRBase accession number | Sequence                   | Cell growth normalized to control |        | IR response normalized to control |        | Category           |
|-----------------|--------------------------|----------------------------|-----------------------------------|--------|-----------------------------------|--------|--------------------|
|                 |                          |                            | Mean (n=4)                        | SEM    | Mean (n=4)                        | SEM    |                    |
| hsa-let-7a      | MI0000060                | UGAGGUAGUAGGUUGUAUAGUU     | 0.8041                            | 0.0084 | 0.5011                            | 0.0124 | —                  |
| hsa-let-7a      | MI0000062                | UGAGGUAGUAGGUUGUAUAGUU     | 0.8539                            | 0.0038 | 0.6082                            | 0.0791 | —                  |
| hsa-let-7a      | MI0000061                | UGAGGUAGUAGGUUGUAUAGUU     | 1.0826                            | 0.0202 | 1.5569                            | 0.0473 | —                  |
| hsa-let-7a*     | MI0000060                | CUAUACAUCUACUGUCUUUC       | 0.9774                            | 0.0624 | 0.7869                            | 0.0261 | —                  |
| hsa-let-7a*     | MI0000062                | CUAUACAUCUACUGUCUUUC       | 0.9802                            | 0.0709 | 1.3474                            | 0.1846 | —                  |
| hsa-let-7b      | MI0000063                | UGAGGUAGUAGGUUGUGUGUU      | 0.9439                            | 0.0042 | 0.5533                            | 0.0420 | —                  |
| hsa-let-7b*     | MI0000063                | CUAUACAACCUACUGCCUCCCC     | 0.6899                            | 0.0074 | 0.3826                            | 0.0070 | IR sensitizing     |
| hsa-let-7c      | MI0000064                | UGAGGUAGUAGGUUGUAUGUU      | 1.0407                            | 0.0271 | 0.9334                            | 0.0421 | —                  |
| hsa-let-7c*     | MI0000064                | UAGAGUUACACCCUGGGAGUUA     | 0.7000                            | 0.0034 | 0.6052                            | 0.0900 | —                  |
| hsa-let-7d      | MI0000065                | AGAGGUAGUAGGUUGCAUAGUU     | 0.7550                            | 0.0179 | 0.2740                            | 0.0161 | IR sensitizing     |
| hsa-let-7d*     | MI0000065                | CUAUACGACUCUGCCUUUCU       | 0.7337                            | 0.0123 | 0.6885                            | 0.1232 | —                  |
| hsa-let-7e      | MI0000066                | UGAGGUAGGAGGUUGUAUAGUU     | 0.8641                            | 0.0204 | 0.2998                            | 0.0470 | IR sensitizing     |
| hsa-let-7e*     | MI0000066                | CUAUACGGCCUCCUAGCUUCC      | 0.8050                            | 0.0187 | 0.5513                            | 0.0620 | —                  |
| hsa-let-7f      | MI0000067                | UGAGGUAGUAGAUUGUAUAGUU     | 0.8799                            | 0.0152 | 0.2869                            | 0.0310 | IR sensitizing     |
| hsa-let-7f      | MI0000068                | UGAGGUAGUAGAUUGUAUAGUU     | 0.7732                            | 0.0135 | 0.2891                            | 0.0176 | IR sensitizing     |
| hsa-let-7f-1*   | MI0000067                | CUAUACAUCUAAUUGCCUCCCC     | 0.6366                            | 0.0256 | 0.1031                            | 0.0117 | IR sensitizing     |
| hsa-let-7f-2*   | MI0000068                | CUAUACAGUCUACUGUCUUUC      | 0.7062                            | 0.0067 | 0.6177                            | 0.0489 | —                  |
| hsa-let-7g      | MI0000433                | UGAGGUAGUAGUUUGUACAGUU     | 0.7924                            | 0.0041 | 0.2524                            | 0.0251 | IR sensitizing     |
| hsa-let-7g*     | MI0000433                | CUGUACAGGCCACUGCCUUGC      | 0.1979                            | 0.0551 | 0.0757                            | 0.0055 | Anti-proliferative |
| hsa-let-7i      | MI0000434                | UGAGGUAGUAGUUUGUGCUGUU     | 0.7524                            | 0.0316 | 0.2350                            | 0.0363 | IR sensitizing     |
| hsa-let-7i*     | MI0000434                | CUGCGCAAGCUACUGCCUUGC      | 0.7183                            | 0.0646 | 0.3437                            | 0.0509 | IR sensitizing     |
| hsa-miR-1       | MI0000437                | UGGAAUGUAAGAAGUAUGUAU      | 0.5377                            | 0.0214 | 0.1247                            | 0.0071 | IR sensitizing     |
| hsa-miR-1       | MI0000651                | UGGAAUGUAAGAAGUAUGUAU      | 0.4341                            | 0.0048 | 0.1000                            | 0.0051 | Anti-proliferative |
| hsa-miR-100     | MI0000102                | AACCCGUAAGUCCGAACUUGUG     | 0.8983                            | 0.0174 | 0.3812                            | 0.0137 | IR sensitizing     |
| hsa-miR-100*    | MI0000102                | CAAGCUUGUAUCUAUAGGUAUG     | 0.7503                            | 0.0199 | 2.2564                            | 0.2427 | IR protective      |
| hsa-miR-101     | MI0000739                | UACAGUACUGUGAUACUGAA       | 0.6885                            | 0.0202 | 0.1710                            | 0.0131 | IR sensitizing     |
| hsa-miR-101     | MI0000103                | UACAGUACUGUGAUACUGAA       | 0.6846                            | 0.0044 | 0.4206                            | 0.0536 | IR sensitizing     |
| hsa-miR-101*    | MI0000103                | CAGUUAUCACAGUGCUGAUGCU     | 0.4609                            | 0.0499 | 0.0519                            | 0.0042 | Anti-proliferative |
| hsa-miR-103     | MI0000109                | AGCAGCAUUGUACAGGGCUAUGA    | 0.7369                            | 0.0019 | 0.2020                            | 0.0284 | IR sensitizing     |
| hsa-miR-103     | MI0000108                | AGCAGCAUUGUACAGGGCUAUGA    | 0.7492                            | 0.0633 | 0.2078                            | 0.0077 | IR sensitizing     |
| hsa-miR-105     | MI0000112                | UCAAAUGCUCAGACUCCUGUGGU    | 0.8355                            | 0.0106 | 0.2478                            | 0.0228 | IR sensitizing     |
| hsa-miR-105     | MI0000111                | UCAAAUGCUCAGACUCCUGUGGU    | 0.8607                            | 0.0051 | 0.2534                            | 0.0139 | IR sensitizing     |
| hsa-miR-105*    | MI0000112                | ACGGAUGUUUGAGCAUGUCUA      | 0.5136                            | 0.0268 | 0.1447                            | 0.0222 | IR sensitizing     |
| hsa-miR-105*    | MI0000111                | ACGGAUGUUUGAGCAUGUCUA      | 0.4246                            | 0.0183 | 0.1631                            | 0.0044 | Anti-proliferative |
| hsa-miR-106a    | MI0000113                | AAAAGUGCUUACAGUGCAGGUAG    | 1.0258                            | 0.0231 | 1.8400                            | 0.0309 | —                  |
| hsa-miR-106a*   | MI0000113                | CUGCAAUGUAAGCACUUCUUC      | 0.4557                            | 0.0070 | 0.0617                            | 0.0040 | Anti-proliferative |
| hsa-miR-106b    | MI0000734                | UAAAGUGCUGACAGUGCAGAU      | 1.0790                            | 0.0177 | 3.9404                            | 0.7860 | IR protective      |
| hsa-miR-106b*   | MI0000734                | CCGCACUGUGGGUACUUGCUGC     | 0.7654                            | 0.0133 | 0.6435                            | 0.0177 | —                  |
| hsa-miR-107     | MI0000114                | AGCAGCAUUGUACAGGGCUAUGA    | 0.7571                            | 0.0281 | 0.3698                            | 0.0131 | IR sensitizing     |
| hsa-miR-10a     | MI0000266                | UACCCUGUAGAUCGAAUUUGUG     | 0.7258                            | 0.0527 | 0.1114                            | 0.0082 | IR sensitizing     |
| hsa-miR-10a*    | MI0000266                | CAAAUUCGUUUCUAGGGGAUA      | 0.6891                            | 0.0139 | 0.3067                            | 0.0652 | IR sensitizing     |
| hsa-miR-10b     | MI0000267                | UACCCUGUAGAACCGAAUUUGUG    | 0.7509                            | 0.0367 | 0.4434                            | 0.0913 | IR sensitizing     |
| hsa-miR-10b*    | MI0000267                | ACAGAUUCGAUUCUAGGGGAU      | 0.7432                            | 0.0079 | 0.2153                            | 0.0147 | IR sensitizing     |
| hsa-miR-122*    | MI0000442                | AACGCCAUUAUCACACUAAUA      | 0.7535                            | 0.0198 | 0.3385                            | 0.0118 | IR sensitizing     |
| hsa-miR-1224-3p | MI0003764                | CCCACCUCCUCUCUCCUCAG       | 1.0097                            | 0.0043 | 2.0936                            | 0.0223 | IR protective      |
| hsa-miR-1224-5p | MI0003764                | GUGAGGACUCGGGAGGUGG        | 0.8604                            | 0.0071 | 1.0604                            | 0.0292 | —                  |
| hsa-miR-1225-3p | MI0006311                | UGAGCCCUUGUGCCGCCCCAG      | 0.9533                            | 0.0088 | 1.3683                            | 0.2551 | —                  |
| hsa-miR-1225-5p | MI0006311                | GUGGGUACGGCCAGUGGGGGG      | 0.9619                            | 0.0151 | 1.7482                            | 0.0148 | —                  |
| hsa-miR-1226    | MI0006313                | UCACCAGCCUGUGUCCCUAG       | 0.8137                            | 0.0061 | 0.1391                            | 0.0102 | IR sensitizing     |
| hsa-miR-1226*   | MI0006313                | GUGAGGGCAUGCAGGCCUGGAUGGGG | 0.8862                            | 0.0269 | 0.4958                            | 0.1015 | IR sensitizing     |
| hsa-miR-1227    | MI0006316                | CGUGCCACCCUUUUCGCCAG       | 0.9856                            | 0.0040 | 0.8686                            | 0.0522 | —                  |
| hsa-miR-1228    | MI0006318                | UCACACCUCCUCGCCCCC         | 0.7914                            | 0.0192 | 0.1245                            | 0.0094 | IR sensitizing     |
| hsa-miR-1228*   | MI0006318                | GUGGGCGGGGGAGGUGUGUG       | 0.8905                            | 0.0076 | 1.4090                            | 0.0255 | —                  |
| hsa-miR-1229    | MI0006319                | CUCUCACCACUGCCUCCACAG      | 0.9422                            | 0.0279 | 2.2888                            | 0.0961 | IR protective      |
| hsa-miR-122a    | MI0000442                | UGGAGUGUGACAAUGGUGUUUG     | 0.3429                            | 0.0173 | 0.0742                            | 0.0069 | Anti-proliferative |

|                 |           |                          |        |        |        |        |                    |
|-----------------|-----------|--------------------------|--------|--------|--------|--------|--------------------|
| hsa-miR-1231    | MI0006321 | GUGUCUGGGCGGACAGCUGC     | 0.1999 | 0.0347 | 0.1333 | 0.0222 | Anti-proliferative |
| hsa-miR-1233    | MI0006323 | UGAGCCUGUCCUCCCGCAG      | 0.8152 | 0.0179 | 0.4917 | 0.0721 | IR sensitizing     |
| hsa-miR-1234    | MI0006324 | UCGGCCUGACCACCCACCCAC    | 0.8020 | 0.0128 | 1.0739 | 0.0884 | —                  |
| hsa-miR-1236    | MI0006326 | CCUCUCCCUUGUCUCUCCAG     | 0.9142 | 0.0065 | 2.4281 | 0.1518 | IR protective      |
| hsa-miR-1237    | MI0006327 | UCCUUCUGUCUCCGCCCCAG     | 0.6807 | 0.0175 | 0.7607 | 0.0366 | —                  |
| hsa-miR-1238    | MI0006328 | CUUCCUCGUCUGUCUGCCCC     | 0.7790 | 0.0123 | 0.2485 | 0.0357 | IR sensitizing     |
| hsa-miR-124*    | MI0000445 | CGUGUUCACAGCGGACCUUGAU   | 0.6167 | 0.0068 | 0.1184 | 0.0272 | IR sensitizing     |
| hsa-miR-124*    | MI0000443 | CGUGUUCACAGCGGACCUUGAU   | 0.7919 | 0.0243 | 0.1527 | 0.0025 | IR sensitizing     |
| hsa-miR-124*    | MI0000444 | CGUGUUCACAGCGGACCUUGAU   | 0.5555 | 0.0763 | 0.4234 | 0.0701 | IR sensitizing     |
| hsa-miR-124a    | MI0000443 | UAAGGCACGCGGUGAAUGCC     | 0.2259 | 0.0094 | 0.0813 | 0.0083 | Anti-proliferative |
| hsa-miR-124a    | MI0000445 | UAAGGCACGCGGUGAAUGCC     | 0.2996 | 0.0328 | 0.0727 | 0.0058 | Anti-proliferative |
| hsa-miR-124a    | MI0000444 | UAAGGCACGCGGUGAAUGCC     | 0.3045 | 0.0298 | 0.0734 | 0.0048 | Anti-proliferative |
| hsa-miR-125a    | MI0000469 | UCCUGAGACCCUUAAACUGUGA   | 0.6538 | 0.0163 | 1.8782 | 0.0619 | —                  |
| hsa-miR-125a-3p | MI0000469 | ACAGGUGAGGUUCUUGGGAGCC   | 0.9197 | 0.1087 | 0.7256 | 0.1533 | —                  |
| hsa-miR-125b    | MI0000446 | UCCUGAGACCCUAAUUGUGA     | 0.6548 | 0.0378 | 1.1348 | 0.0734 | —                  |
| hsa-miR-125b    | MI0000470 | UCCUGAGACCCUAAUUGUGA     | 0.6563 | 0.0152 | 1.4880 | 0.2437 | —                  |
| hsa-miR-125b-1* | MI0000446 | ACGGGUUAGGCUCUUGGGAGCU   | 0.7647 | 0.0217 | 0.2458 | 0.0068 | IR sensitizing     |
| hsa-miR-125b-2* | MI0000470 | UCACAAGUCAGGCUCUUGGGAG   | 0.9972 | 0.1009 | 4.6357 | 0.9417 | IR protective      |
| hsa-miR-126     | MI0000471 | UCGUACCGUGAGUUAUUGGC     | 1.0571 | 0.0117 | 0.5000 | 0.1012 | IR sensitizing     |
| hsa-miR-126*    | MI0000471 | CAUUAUUACUUAUUGGUACGCG   | 0.7301 | 0.0119 | 0.4610 | 0.1073 | IR sensitizing     |
| hsa-miR-127     | MI0000472 | UCGGAUCCGUCUGAGCUUGGCU   | 0.4104 | 0.0265 | 0.1072 | 0.0047 | Anti-proliferative |
| hsa-miR-127-5p  | MI0000472 | CUGAAGCUCAGAGGGCUCUGAU   | 0.5921 | 0.0562 | 0.2370 | 0.0483 | IR sensitizing     |
| hsa-miR-128     | MI0000727 | UCACAGUGAACCGGUCUCUUU    | 0.9270 | 0.0241 | 1.3883 | 0.1277 | —                  |
| hsa-miR-128a    | MI0000447 | UCACAGUGAACCGGUCUCUUU    | 0.8806 | 0.0043 | 0.7198 | 0.0378 | —                  |
| hsa-miR-129     | MI0000473 | CUUUUUGCGGUCUGGCUUGC     | 0.4263 | 0.0907 | 0.1287 | 0.0145 | Anti-proliferative |
| hsa-miR-129     | MI0000252 | CUUUUUGCGGUCUGGCUUGC     | 0.4323 | 0.0808 | 0.0770 | 0.0096 | Anti-proliferative |
| hsa-miR-129*    | MI0000252 | AAGCCUUACCCCAAAAAGUAU    | 0.5045 | 0.0348 | 0.0749 | 0.0014 | IR sensitizing     |
| hsa-miR-129-3p  | MI0000473 | AAGCCUUACCCCAAAAAGCAU    | 0.4807 | 0.0628 | 0.1701 | 0.0302 | Anti-proliferative |
| hsa-miR-130a    | MI0000448 | CAGUGCAAUGUUAAGGGCAU     | 0.8722 | 0.0410 | 2.3713 | 0.2203 | IR protective      |
| hsa-miR-130a*   | MI0000448 | UUCACAUUGUGCUACUGUCUGC   | 0.7124 | 0.0034 | 0.6782 | 0.1228 | —                  |
| hsa-miR-130b    | MI0000748 | CAGUGCAAUGAUGAAAGGGCAU   | 0.9770 | 0.0409 | 0.3931 | 0.0257 | IR sensitizing     |
| hsa-miR-130b*   | MI0000748 | ACUCUUUCCUGUUGCACUAC     | 0.5371 | 0.0373 | 0.0483 | 0.0024 | IR sensitizing     |
| hsa-miR-132     | MI0000449 | UAACAGUCUACAGCCAUGGUCG   | 0.8417 | 0.0321 | 1.0809 | 0.1279 | —                  |
| hsa-miR-132*    | MI0000449 | ACCGUGGCUUUCGAUUGUUACU   | 0.3933 | 0.1653 | 0.0476 | 0.0006 | Anti-proliferative |
| hsa-miR-133a    | MI0000450 | UUUGGUCCCUUAACACAGCUG    | 0.3645 | 0.0344 | 0.0888 | 0.0017 | Anti-proliferative |
| hsa-miR-133a    | MI0000451 | UUUGGUCCCUUAACACAGCUG    | 0.4087 | 0.0047 | 0.1003 | 0.0117 | Anti-proliferative |
| hsa-miR-133b    | MI0000822 | UUUGGUCCCUUAACACAGCUA    | 0.2571 | 0.0057 | 0.0678 | 0.0082 | Anti-proliferative |
| hsa-miR-134     | MI0000474 | UGUGACUGGUUACCAGAGGGG    | 0.4863 | 0.0067 | 0.1321 | 0.0061 | Anti-proliferative |
| hsa-miR-135a    | MI0000453 | UAUGGCUUUUUUUAUCCUAUGUGA | 0.6617 | 0.0191 | 0.0884 | 0.0055 | IR sensitizing     |
| hsa-miR-135a    | MI0000452 | UAUGGCUUUUUUUAUCCUAUGUGA | 0.3111 | 0.0178 | 0.0489 | 0.0033 | Anti-proliferative |
| hsa-miR-135a*   | MI0000452 | UAUAGGGAUUGGAGCCUGGGCG   | 0.7943 | 0.0214 | 0.1906 | 0.0128 | IR sensitizing     |
| hsa-miR-135b    | MI0000810 | UAUGGCUUUUUAUCCUAUGUGA   | 0.2949 | 0.0387 | 0.0670 | 0.0053 | Anti-proliferative |
| hsa-miR-135b*   | MI0000810 | AUGUAGGGCUAAAAGCCAUGGG   | 0.3620 | 0.0599 | 0.0787 | 0.0117 | Anti-proliferative |
| hsa-miR-136     | MI0000475 | ACUCCAUUUUUUUGAUGAUGGA   | 0.7618 | 0.0299 | 0.2456 | 0.0668 | IR sensitizing     |
| hsa-miR-136*    | MI0000475 | CAUCAUCGUCUAAAUGAGUCU    | 0.2166 | 0.0284 | 0.0838 | 0.0175 | Anti-proliferative |
| hsa-miR-137     | MI0000454 | UUAUJGCUAAGAAUACGGUAG    | 0.8045 | 0.0194 | 0.3669 | 0.0318 | IR sensitizing     |
| hsa-miR-138     | MI0000455 | AGCUGGUGUUGUGAAUCAGGCCG  | 0.5387 | 0.0257 | 0.2812 | 0.0111 | IR sensitizing     |
| hsa-miR-138     | MI0000476 | AGCUGGUGUUGUGAAUCAGGCCG  | 0.4689 | 0.0079 | 0.2715 | 0.0191 | Anti-proliferative |
| hsa-miR-138-1*  | MI0000476 | GCUACUUCACAACAGGGGCC     | 0.9918 | 0.0800 | 2.6303 | 0.6601 | IR protective      |
| hsa-miR-138-2*  | MI0000455 | GCUAUUUCACGACACCAGGGUU   | 1.0048 | 0.0143 | 0.5456 | 0.0413 | —                  |
| hsa-miR-139     | MI0000261 | UCUACAGUGCACGUGUCUCCAG   | 0.8448 | 0.0169 | 1.0647 | 0.1519 | —                  |
| hsa-miR-139-3p  | MI0000261 | GGAGACGCGGCCUGUUGGAGU    | 0.6889 | 0.0195 | 0.6288 | 0.1835 | —                  |
| hsa-miR-140     | MI0000456 | CAGUGGUUUUACCCUAUGGUAG   | 0.8117 | 0.0198 | 0.2087 | 0.0146 | IR sensitizing     |
| hsa-miR-140-3p  | MI0000456 | UACCACAGGGUAGAACCACGG    | 1.1001 | 0.0102 | 1.4576 | 0.1591 | —                  |
| hsa-miR-141     | MI0000457 | UAACACUGUCUGGUAAGAUGG    | 0.7707 | 0.0306 | 0.6462 | 0.0853 | —                  |
| hsa-miR-141*    | MI0000457 | CAUCUCCAGUACAGUUGGGA     | 0.8234 | 0.0148 | 0.2189 | 0.0160 | IR sensitizing     |
| hsa-miR-142-3p  | MI0000458 | UGUAGUGUUUCCUACUUUAUGGA  | 0.8772 | 0.0559 | 0.3713 | 0.0310 | IR sensitizing     |
| hsa-miR-142-5p  | MI0000458 | CAUAAAGUAGAAAGCACUACU    | 0.7510 | 0.0267 | 1.3318 | 0.0615 | —                  |
| hsa-miR-143     | MI0000459 | UGAGAUGAAGCACUGUAGCUC    | 0.6571 | 0.0083 | 0.1961 | 0.0102 | IR sensitizing     |
| hsa-miR-143*    | MI0000459 | GGUGCAGUGCUGCAUCUCUGGU   | 0.8151 | 0.0034 | 1.0073 | 0.0480 | —                  |
| hsa-miR-144     | MI0000460 | UACAGUAUAGAUAUGUACU      | 0.7265 | 0.0192 | 0.4161 | 0.0165 | IR sensitizing     |
| hsa-miR-144*    | MI0000460 | GGUAUCAUCAUAUCUGUAAG     | 0.6358 | 0.0753 | 0.2359 | 0.0087 | IR sensitizing     |
| hsa-miR-145     | MI0000461 | GUCCAGUUUCCCAGAAUCCCU    | 0.6547 | 0.0132 | 0.3191 | 0.0494 | IR sensitizing     |
| hsa-miR-145*    | MI0000461 | GGAUUCCUGGAAAUACUGUUCU   | 0.8760 | 0.1298 | 4.8001 | 1.5232 | IR protective      |
| hsa-miR-146a    | MI0000477 | UGAGAUCUGAAUCCAUUGGUU    | 0.7096 | 0.0566 | 0.2440 | 0.0409 | IR sensitizing     |
| hsa-miR-146a*   | MI0000477 | CCUCUGAAAUUCAGUCCGAG     | 1.0002 | 0.0788 | 2.2984 | 0.0838 | IR protective      |
| hsa-miR-146b    | MI0003129 | UGAGAUCUGAAUCCAUAGGCU    | 0.9191 | 0.0056 | 0.2987 | 0.0301 | IR sensitizing     |
| hsa-miR-146b-3p | MI0003129 | UGCCUGUGGACUCAGUUCUGG    | 0.6385 | 0.0100 | 1.6192 | 0.0912 | —                  |

|                 |           |                          |        |        |        |        |                    |
|-----------------|-----------|--------------------------|--------|--------|--------|--------|--------------------|
| hsa-miR-147     | MI0000262 | GUGUGUGGAAUGCUUCUGC      | 0.7001 | 0.0178 | 1.1967 | 0.0906 | —                  |
| hsa-miR-147b    | MI0005544 | GUGUGCGGAAUGCUUCUGCUA    | 0.8968 | 0.0155 | 0.5854 | 0.0693 | —                  |
| hsa-miR-148a    | MI0000253 | UCAGUGCACUACAGAACUUUGU   | 0.9991 | 0.0228 | 0.9673 | 0.1019 | —                  |
| hsa-miR-148a*   | MI0000253 | AAAGUUCUGAGACACUCCGACU   | 0.7722 | 0.0040 | 0.6838 | 0.0426 | —                  |
| hsa-miR-148b    | MI0000811 | UCAGUGCAUCACAGAACUUUGU   | 0.8526 | 0.0268 | 0.5226 | 0.0392 | —                  |
| hsa-miR-148b*   | MI0000811 | AAGUUCUGUUUACACUCAGGC    | 0.5011 | 0.0154 | 0.1069 | 0.0075 | IR sensitizing     |
| hsa-miR-149     | MI0000478 | UCUGGCUCGUGUCUUCACUCCC   | 0.8050 | 0.0072 | 0.5235 | 0.0808 | —                  |
| hsa-miR-149*    | MI0000478 | AGGGAGGGACGGGGCGUGGC     | 0.5380 | 0.0521 | 0.2459 | 0.0263 | IR sensitizing     |
| hsa-miR-150     | MI0000479 | UCUCCCAACCCUUGUACCAGUG   | 0.7342 | 0.0352 | 0.8894 | 0.1537 | —                  |
| hsa-miR-150*    | MI0000479 | CUGGUACAGGCCUGGGGGACAG   | 0.9845 | 0.0794 | 2.6782 | 0.1093 | IR protective      |
| hsa-miR-151     | MI0000809 | CUAGACUGAAGCUCCUUGAGG    | 0.7966 | 0.0158 | 0.2138 | 0.0147 | IR sensitizing     |
| hsa-miR-151-5p  | MI0000809 | UCGAGGAGCUCACAGUCUAGU    | 0.3911 | 0.0753 | 0.4896 | 0.1060 | Anti-proliferative |
| hsa-miR-152     | MI0000462 | UCAGUGCAUGACAGAACUUUGG   | 0.7439 | 0.0249 | 0.5946 | 0.0321 | —                  |
| hsa-miR-153     | MI0000463 | UUGCAUAGUCACAAAAGUGAUC   | 0.3778 | 0.0468 | 0.0520 | 0.0031 | Anti-proliferative |
| hsa-miR-153     | MI0000464 | UUGCAUAGUCACAAAAGUGAUC   | 0.3808 | 0.0082 | 0.0443 | 0.0022 | Anti-proliferative |
| hsa-miR-154     | MI0000480 | UAGGUUAUCGGUGUUGCCUUCG   | 0.6328 | 0.0572 | 0.1059 | 0.0180 | IR sensitizing     |
| hsa-miR-154*    | MI0000480 | AAUCAUACACGGUUGACCUAUU   | 0.7065 | 0.0268 | 0.3843 | 0.0240 | IR sensitizing     |
| hsa-miR-155     | MI0000681 | UUAAUGCUAAUCGUGAUAGGGGU  | 0.6851 | 0.0262 | 0.5770 | 0.0160 | —                  |
| hsa-miR-155*    | MI0000681 | CUCCUACAUAUAGCAUUUAACA   | 0.7936 | 0.0132 | 1.4928 | 0.0445 | —                  |
| hsa-miR-15a     | MI0000069 | UAGCAGCACAUAAUGUUUGUG    | 0.3351 | 0.0077 | 0.0535 | 0.0024 | Anti-proliferative |
| hsa-miR-15a*    | MI0000069 | CAGGCCAUUUGUGCUGCCUCA    | 0.6242 | 0.0152 | 0.3361 | 0.0504 | IR sensitizing     |
| hsa-miR-15b     | MI0000438 | UAGCAGCACAUCAUGGUUUACA   | 0.3339 | 0.0021 | 0.0671 | 0.0088 | Anti-proliferative |
| hsa-miR-15b*    | MI0000438 | CGAAUCAUUAUUUGCUGCUCU    | 1.0552 | 0.0401 | 3.2178 | 0.3787 | IR protective      |
| hsa-miR-16      | MI0000115 | UAGCAGCACGUAUUUUGGGC     | 0.6786 | 0.1051 | 0.0842 | 0.0093 | IR sensitizing     |
| hsa-miR-16      | MI0000070 | UAGCAGCACGUAUUUUGGGC     | 0.2514 | 0.0840 | 0.0384 | 0.0022 | Anti-proliferative |
| hsa-miR-16-1*   | MI0000070 | CCAGUAUUUACUGUCUGCUGA    | 0.6827 | 0.0119 | 1.1763 | 0.2622 | —                  |
| hsa-miR-16-2*   | MI0000115 | CCAUAUUUACUGUCUGCUUUA    | 0.7163 | 0.0051 | 0.4185 | 0.0152 | IR sensitizing     |
| hsa-miR-17-3p   | MI0000071 | ACUGCAGUGAAGGCACUUGUAG   | 0.7322 | 0.0196 | 0.4307 | 0.0465 | IR sensitizing     |
| hsa-miR-17-5p   | MI0000071 | CAAAGUGCUUACAGUCAGGUAG   | 0.8932 | 0.0157 | 1.1356 | 0.2616 | —                  |
| hsa-miR-181a    | MI0000289 | AACAUUCAACGCUGUCGGUGAGU  | 0.8346 | 0.0322 | 0.1738 | 0.0177 | IR sensitizing     |
| hsa-miR-181a    | MI0000269 | AACAUUCAACGCUGUCGGUGAGU  | 0.8435 | 0.0215 | 0.2398 | 0.0116 | IR sensitizing     |
| hsa-miR-181a-2* | MI0000269 | ACCACUGACCGUUGACUGUACC   | 0.7755 | 0.0073 | 1.2687 | 0.1001 | —                  |
| hsa-miR-181b    | MI0000270 | AACAUUCAUUGCUGUCGGUGGGU  | 0.7842 | 0.0052 | 0.5033 | 0.0442 | —                  |
| hsa-miR-181b    | MI0000683 | AACAUUCAUUGCUGUCGGUGGGU  | 0.7746 | 0.0150 | 0.5445 | 0.0288 | —                  |
| hsa-miR-181c    | MI0000271 | AACAUUCAACCGUUGCUGGUGAGU | 0.6438 | 0.0365 | 0.2587 | 0.0165 | IR sensitizing     |
| hsa-miR-181c*   | MI0000271 | AACCAUCGACCGUUGAGUGGAC   | 0.2524 | 0.0437 | 0.2070 | 0.0393 | Anti-proliferative |
| hsa-miR-181d    | MI0003139 | AACAUUCAUUGUUGCUGGGUGGU  | 0.8900 | 0.0094 | 0.6879 | 0.1043 | —                  |
| hsa-miR-182     | MI0000272 | UUUGGCAAUGGUAGAACUCACACU | 0.7557 | 0.0060 | 0.7695 | 0.0280 | —                  |
| hsa-miR-182*    | MI0000272 | UGGUUCUAGACUUGCCAACUA    | 0.2430 | 0.0335 | 0.0757 | 0.0060 | Anti-proliferative |
| hsa-miR-183     | MI0000273 | UAUGGCACUGGUAGAAUUCACU   | 0.2110 | 0.0294 | 0.0658 | 0.0046 | Anti-proliferative |
| hsa-miR-183*    | MI0000273 | GUGAAUUACCGAAGGGCCAUAA   | 0.6406 | 0.0484 | 0.2805 | 0.0473 | IR sensitizing     |
| hsa-miR-184     | MI0000481 | UGGACGGAGAACUGAUAGGGU    | 0.2049 | 0.0186 | 0.0548 | 0.0043 | Anti-proliferative |
| hsa-miR-185     | MI0000482 | UGGAGAGAAAGGCAGUUCUGA    | 0.1253 | 0.0106 | 0.0522 | 0.0029 | Anti-proliferative |
| hsa-miR-185*    | MI0000482 | AGGGGCUGGCUUUCUCUGGUC    | 0.2913 | 0.0318 | 0.0734 | 0.0040 | Anti-proliferative |
| hsa-miR-186     | MI0000483 | CAAAGAAUUCUCCUUUGGGCU    | 0.7772 | 0.0138 | 0.6923 | 0.0313 | —                  |
| hsa-miR-186*    | MI0000483 | GCCCAAAGGUGAAUUUUUGGG    | 0.7949 | 0.0225 | 1.6348 | 0.2281 | —                  |
| hsa-miR-187     | MI0000274 | UCGUGUCUUGUUGCAGCCGG     | 0.7899 | 0.0055 | 0.5550 | 0.0248 | —                  |
| hsa-miR-187*    | MI0000274 | GGCUACAACACAGGACCCGGC    | 0.8707 | 0.0190 | 1.6240 | 0.1864 | —                  |
| hsa-miR-188     | MI0000484 | CAUCCCUUGCAUGGUGGAGGG    | 0.8175 | 0.0086 | 0.7912 | 0.0285 | —                  |
| hsa-miR-188-3p  | MI0000484 | CUCCCAUCAGCGGUUUGCA      | 0.7766 | 0.0070 | 1.0087 | 0.1290 | —                  |
| hsa-miR-189     | MI0000080 | UGCCUACUGAGCUGAUUCAGU    | 0.6842 | 0.0038 | 0.5770 | 0.1366 | —                  |
| hsa-miR-18a     | MI0000072 | UAAGGUGCAUCUAGUGCAGAUAG  | 0.8138 | 0.0101 | 0.3623 | 0.0374 | IR sensitizing     |
| hsa-miR-18a*    | MI0000072 | ACUGCCCUAAGUGCUCUUCUGG   | 0.7276 | 0.0041 | 0.6274 | 0.0584 | —                  |
| hsa-miR-18b     | MI0001518 | UAAGGUGCAUCUAGUGCAGUUAG  | 0.7583 | 0.0023 | 0.3197 | 0.0129 | IR sensitizing     |
| hsa-miR-18b*    | MI0001518 | UGCCCUAAAUGCCCUUCUGGC    | 0.6900 | 0.0183 | 0.7755 | 0.1860 | —                  |
| hsa-miR-190     | MI0000486 | UGAUUGUUUGAUUAUUAGGU     | 0.6262 | 0.0414 | 0.1423 | 0.0067 | IR sensitizing     |
| hsa-miR-190b    | MI0005545 | UGAUUGUUUGAUUAUUAGGUU    | 0.6573 | 0.0498 | 0.2189 | 0.0382 | IR sensitizing     |
| hsa-miR-191     | MI0000465 | CACGGAAUCCCAAAGCAGCUG    | 0.7225 | 0.0109 | 0.4522 | 0.0129 | IR sensitizing     |
| hsa-miR-191*    | MI0000465 | GCUGCGCUUGGAUUUCGUCCCC   | 1.1864 | 0.0273 | 3.2168 | 0.6197 | IR protective      |
| hsa-miR-192     | MI0000234 | CUGACCUAUGAAUUGACAGCC    | 0.9028 | 0.0381 | 0.3292 | 0.0140 | IR sensitizing     |
| hsa-miR-192*    | MI0000234 | CUGCCAAUUCUAAUGGACAG     | 0.7635 | 0.0169 | 0.4231 | 0.1182 | IR sensitizing     |
| hsa-miR-193a    | MI0000487 | AACUGGCCUACAAAGUCCAGU    | 0.1215 | 0.0321 | 0.0461 | 0.0067 | Anti-proliferative |
| hsa-miR-193a-5p | MI0000487 | UGGGUCUUUGCGGGCAGAUAGA   | 0.5396 | 0.0384 | 0.2588 | 0.0436 | IR sensitizing     |
| hsa-miR-193b    | MI0003137 | AACUGGCCCUCAAAGUCCCGCU   | 0.4375 | 0.0343 | 0.1433 | 0.0455 | Anti-proliferative |
| hsa-miR-193b*   | MI0003137 | CGGGGUUUUGAGGGCAGAUAGA   | 0.2389 | 0.0341 | 0.1880 | 0.0249 | Anti-proliferative |
| hsa-miR-194     | MI0000732 | UGUAACAGCAACUCCAUGUGGA   | 0.7185 | 0.0080 | 0.6237 | 0.0234 | —                  |
| hsa-miR-194     | MI0000488 | UGUAACAGCAACUCCAUGUGGA   | 0.8403 | 0.0172 | 0.7118 | 0.1351 | —                  |
| hsa-miR-194*    | MI0000732 | CCAGUGGGGUCUGUUAUCUG     | 0.6732 | 0.0151 | 0.5545 | 0.0093 | —                  |

|                  |           |                         |        |        |        |        |                    |
|------------------|-----------|-------------------------|--------|--------|--------|--------|--------------------|
| hsa-miR-195      | MI0000489 | UAGCAGCACAGAAAUUUGGC    | 0.1668 | 0.0159 | 0.0442 | 0.0026 | Anti-proliferative |
| hsa-miR-195*     | MI0000489 | CCAAUUAUUGGCUGUGCUGCUCC | 0.9332 | 0.0378 | 2.1295 | 0.4623 | IR protective      |
| hsa-miR-196a     | MI0000279 | UAGGUAGUUUAUGUUGUUGGG   | 0.6660 | 0.0378 | 0.1354 | 0.0164 | IR sensitizing     |
| hsa-miR-196a     | MI0000238 | UAGGUAGUUUAUGUUGUUGGG   | 0.5845 | 0.0247 | 0.1661 | 0.0127 | IR sensitizing     |
| hsa-miR-196a*    | MI0000279 | CGGCAACAAGAAACUGCCUGAG  | 0.7403 | 0.0076 | 0.1755 | 0.0166 | IR sensitizing     |
| hsa-miR-196b     | MI0001150 | UAGGUAGUUUCCUGUUGUUGGG  | 0.5182 | 0.0334 | 0.1262 | 0.0059 | IR sensitizing     |
| hsa-miR-197      | MI0000239 | UUCACCACCUUCUCCACCCAGC  | 0.5603 | 0.0530 | 0.1521 | 0.0164 | IR sensitizing     |
| hsa-miR-198      | MI0000240 | GGUCCAGAGGGGAGAUAGGUUC  | 0.7814 | 0.0131 | 0.6914 | 0.0389 | —                  |
| hsa-miR-199a     | MI0000242 | CCCAGUGUUCAGACUACCGUUC  | 0.8547 | 0.0077 | 0.3023 | 0.0440 | IR sensitizing     |
| hsa-miR-199a     | MI0000281 | CCCAGUGUUCAGACUACCGUUC  | 0.8296 | 0.0149 | 0.4195 | 0.0587 | IR sensitizing     |
| hsa-miR-199a*    | MI0000242 | ACAGUAGUCUGCACAUUGGUUA  | 0.6963 | 0.0108 | 0.1556 | 0.0325 | IR sensitizing     |
| hsa-miR-199a*    | MI0000281 | ACAGUAGUCUGCACAUUGGUUA  | 0.6344 | 0.0055 | 0.1793 | 0.0183 | IR sensitizing     |
| hsa-miR-199b     | MI0000282 | CCCAGUUGUAGCAUUCUGUUC   | 0.9481 | 0.0170 | 0.8395 | 0.2199 | —                  |
| hsa-miR-199b-3p  | MI0000282 | ACAGUAGUCUGCACAUUGGUUA  | 0.6038 | 0.0069 | 0.1767 | 0.0046 | IR sensitizing     |
| hsa-miR-19a      | MI0000073 | UGUGCAAUCUAUGCAAACUGA   | 1.1559 | 0.0166 | 2.1580 | 0.1567 | IR protective      |
| hsa-miR-19a*     | MI0000073 | AGUUUUGCAUAGUUGCACUACA  | 0.7516 | 0.0060 | 0.1632 | 0.0471 | IR sensitizing     |
| hsa-miR-19b      | MI0000075 | UGUGCAAUCCAUGCAAACUGA   | 0.7908 | 0.0033 | 0.5063 | 0.0641 | —                  |
| hsa-miR-19b      | MI0000074 | UGUGCAAUCCAUGCAAACUGA   | 1.1556 | 0.0158 | 1.7764 | 0.0951 | —                  |
| hsa-miR-19b-1*   | MI0000074 | AGUUUUGCAGGUUUGCAUCCAGC | 0.3064 | 0.0389 | 0.0762 | 0.0171 | Anti-proliferative |
| hsa-miR-19b-2*   | MI0000075 | AGUUUUGCAGGUUUGCAUCCAGC | 0.7974 | 0.0117 | 0.2561 | 0.0341 | IR sensitizing     |
| hsa-miR-200a     | MI0000737 | UAAACACUGUCUGGUAACGAUGU | 0.7191 | 0.0029 | 0.8654 | 0.0582 | —                  |
| hsa-miR-200a*    | MI0000737 | CAUCUUACCGGACAGUCUGGA   | 0.5586 | 0.0108 | 0.1723 | 0.0154 | IR sensitizing     |
| hsa-miR-200b     | MI0000342 | UAAUACUGCCUGGUAUUGAUGA  | 0.6465 | 0.0129 | 1.1028 | 0.1877 | —                  |
| hsa-miR-200b*    | MI0000342 | CAUCUUACUGGGCAGCAUUGGA  | 1.0400 | 0.0244 | 1.0418 | 0.3028 | —                  |
| hsa-miR-200c     | MI0000650 | UAAUACUGCCGGUAAUGAUGGA  | 0.7223 | 0.0103 | 0.6592 | 0.0337 | —                  |
| hsa-miR-200c*    | MI0000650 | CGUCUUACCCAGCAGUUGUUGG  | 0.7621 | 0.0340 | 0.5579 | 0.0416 | —                  |
| hsa-miR-202      | MI0003130 | AGAGGUUAUGGGCAUUGGGAA   | 0.7818 | 0.0070 | 0.8630 | 0.2861 | —                  |
| hsa-miR-202*     | MI0003130 | UUCUAUGCAUUAUCUUCUUUG   | 0.7548 | 0.0287 | 3.0340 | 0.4219 | IR protective      |
| hsa-miR-203      | MI0000283 | GUGAAAUGUUUAGGACCACUAG  | 0.8830 | 0.0041 | 0.4633 | 0.0239 | IR sensitizing     |
| hsa-miR-204      | MI0000284 | UUCUUUUGUCAUCCUUAUGCCU  | 0.6626 | 0.0227 | 0.3020 | 0.0141 | IR sensitizing     |
| hsa-miR-205      | MI0000285 | UCCUUCAUUCCACUGCAGUCUG  | 0.7803 | 0.0066 | 1.6478 | 0.0849 | —                  |
| hsa-miR-206      | MI0000490 | UGGAAUGUAAGGAAGUGUGUGG  | 0.4253 | 0.0190 | 0.1063 | 0.0066 | Anti-proliferative |
| hsa-miR-208      | MI0000251 | AUAAGACGAGCAAAAAGCUUGU  | 0.5488 | 0.0272 | 0.1825 | 0.0082 | IR sensitizing     |
| hsa-miR-208b     | MI0005570 | AUAAGACGAACAAAAGGUUUGU  | 0.2667 | 0.0027 | 0.0636 | 0.0043 | Anti-proliferative |
| hsa-miR-20a      | MI0000076 | UAAAGUGCUUAUAGUGCAGGUAG | 1.1360 | 0.0162 | 3.8424 | 0.4255 | IR protective      |
| hsa-miR-20a*     | MI0000076 | ACUGCAUUAUGAGCACUUAAG   | 0.6851 | 0.0125 | 1.3882 | 0.0696 | —                  |
| hsa-miR-20b      | MI0001519 | CAAAGUGCUCAUAGUGCAGGUAG | 1.0941 | 0.0300 | 4.0617 | 0.8014 | IR protective      |
| hsa-miR-20b*     | MI0001519 | ACUGUAGUAUGGGCACUCCAG   | 0.5879 | 0.0178 | 0.2601 | 0.0359 | IR sensitizing     |
| hsa-miR-21       | MI0000077 | UAGCUUAUCAGACUGAUGUUGA  | 1.0929 | 0.0223 | 2.8244 | 0.0922 | IR protective      |
| hsa-miR-21*      | MI0000077 | CAACACCAGUCGAGGGCUGU    | 0.5042 | 0.0336 | 0.2441 | 0.0448 | IR sensitizing     |
| hsa-miR-210      | MI0000286 | CUGUGCGUGUGACAGCGGCUGA  | 0.7864 | 0.0474 | 0.4375 | 0.0263 | IR sensitizing     |
| hsa-miR-211      | MI0000287 | UUCUUUUGUCAUCCUUCGCCU   | 0.8553 | 0.0486 | 0.6871 | 0.1291 | —                  |
| hsa-miR-212      | MI0000288 | UAAACUGUCUCCAGCAGCGCC   | 0.8810 | 0.0179 | 0.4752 | 0.0426 | IR sensitizing     |
| hsa-miR-213      | MI0000289 | ACCAUCGACCGUUGAUUGUACC  | 0.9688 | 0.0245 | 2.2163 | 0.2105 | IR protective      |
| hsa-miR-214      | MI0000290 | ACAGCAGGCACAGACAGGCAGU  | 0.6902 | 0.0142 | 0.2366 | 0.0664 | IR sensitizing     |
| hsa-miR-214*     | MI0000290 | UGCCUGUCUACACUUGCUGUGC  | 0.1295 | 0.0073 | 0.0768 | 0.0065 | Anti-proliferative |
| hsa-miR-215      | MI0000291 | AUGACCUAUGAAUUGACAGAC   | 0.6567 | 0.0137 | 0.2648 | 0.0078 | IR sensitizing     |
| hsa-miR-216      | MI0000292 | UAAUCUCAGCUGGCAACUGUGA  | 0.8020 | 0.0089 | 0.3836 | 0.0289 | IR sensitizing     |
| hsa-miR-216b     | MI0005569 | AAAUCUCUGCAGGCAAAUGUGA  | 0.7647 | 0.0067 | 0.2287 | 0.0250 | IR sensitizing     |
| hsa-miR-217      | MI0000293 | UACUGCAUCAGGAACUGAUUGGA | 0.5067 | 0.0140 | 0.1320 | 0.0261 | IR sensitizing     |
| hsa-miR-218      | MI0000295 | UUGUGCUUGAUCUAACCAUGU   | 0.8539 | 0.0240 | 0.5689 | 0.0309 | —                  |
| hsa-miR-218      | MI0000294 | UUGUGCUUGAUCUAACCAUGU   | 0.6356 | 0.0189 | 0.4202 | 0.0102 | IR sensitizing     |
| hsa-miR-218-1*   | MI0000294 | AUGGUUCCGUAAGCACAUGG    | 0.6901 | 0.0238 | 0.2256 | 0.0307 | IR sensitizing     |
| hsa-miR-218-2*   | MI0000295 | CAUGGUUCUGUCAAGCAGCGCG  | 0.7913 | 0.0028 | 0.2207 | 0.0329 | IR sensitizing     |
| hsa-miR-219      | MI0000740 | UGAUUGUCCAACGCAAUUCU    | 0.6526 | 0.0099 | 0.2798 | 0.0035 | IR sensitizing     |
| hsa-miR-219      | MI0000296 | UGAUUGUCCAACGCAAUUCU    | 0.7938 | 0.0245 | 0.3055 | 0.0325 | IR sensitizing     |
| hsa-miR-219-1-3p | MI0000296 | AGAGUUGAGUCUGGACGUCCCG  | 0.1430 | 0.0109 | 0.1022 | 0.0047 | Anti-proliferative |
| hsa-miR-219-2-3p | MI0000740 | AGAAUUGUGGCUGGACAUCUGU  | 0.8604 | 0.0581 | 0.7319 | 0.1978 | —                  |
| hsa-miR-22       | MI0000078 | AAGCUGCCAGUUGAAGAACUGU  | 0.3114 | 0.0920 | 0.1175 | 0.0106 | Anti-proliferative |
| hsa-miR-22*      | MI0000078 | AGUUCUUCAGUGGCAAGCUUUA  | 0.5484 | 0.0061 | 0.2162 | 0.0522 | IR sensitizing     |
| hsa-miR-220      | MI0000297 | CCACACCGUAUCUGACACUUU   | 0.9293 | 0.0278 | 3.2974 | 0.6668 | IR protective      |
| hsa-miR-220b     | MI0005529 | CCACACCGUGUCUGACACUU    | 0.9062 | 0.0086 | 2.7272 | 0.4429 | IR protective      |
| hsa-miR-220c     | MI0005536 | ACACAGGGCUGUUGUGAAGACU  | 0.6362 | 0.0409 | 0.0798 | 0.0107 | IR sensitizing     |
| hsa-miR-221      | MI0000298 | AGCUACAUUGUCUGUGGGUUUC  | 0.6896 | 0.0074 | 0.6464 | 0.0328 | —                  |
| hsa-miR-221*     | MI0000298 | ACCUGGCAUACAUGUAGAUUU   | 0.5800 | 0.0598 | 0.1428 | 0.0052 | IR sensitizing     |
| hsa-miR-222      | MI0000299 | AGCUACAUCUGGCUACUGGGU   | 0.7901 | 0.0055 | 0.5577 | 0.0257 | —                  |
| hsa-miR-222*     | MI0000299 | CUCAGUAGCCAGUGUAGAUCCU  | 0.4253 | 0.0291 | 0.0922 | 0.0017 | Anti-proliferative |
| hsa-miR-223      | MI0000300 | UGUCAGUUUGUCAAAUACCCCA  | 0.7472 | 0.0028 | 0.5337 | 0.0551 | —                  |

|                |           |                          |        |        |        |        |                    |
|----------------|-----------|--------------------------|--------|--------|--------|--------|--------------------|
| hsa-miR-223*   | MI0000300 | CGUGUAAUUUGACAAGCUGAGUUU | 0.6696 | 0.0031 | 0.1172 | 0.0158 | IR sensitizing     |
| hsa-miR-224    | MI0000301 | CAAGUCACUAGUGGUUCCGUU    | 0.7441 | 0.0265 | 0.3164 | 0.0334 | IR sensitizing     |
| hsa-miR-23a    | MI0000079 | AUCACAUUGCCAGGGAAUUUCC   | 1.0995 | 0.0133 | 3.2699 | 0.3492 | IR protective      |
| hsa-miR-23a*   | MI0000079 | GGGUUCCUGGGGAUGGGAAUUU   | 0.8400 | 0.0076 | 2.0516 | 0.4321 | IR protective      |
| hsa-miR-23b    | MI0000439 | AUCACAUUGCCAGGGAAUUUCC   | 0.6320 | 0.0190 | 1.1405 | 0.0289 | —                  |
| hsa-miR-23b*   | MI0000439 | UGGUUCCUGGCAUGCUGAUUU    | 0.5624 | 0.0226 | 0.1454 | 0.0332 | IR sensitizing     |
| hsa-miR-24     | MI0000081 | UGGCUCAGUUCAGCAGGAACAG   | 0.6465 | 0.1565 | 0.1272 | 0.0088 | IR sensitizing     |
| hsa-miR-24     | MI0000080 | UGGCUCAGUUCAGCAGGAACAG   | 0.4347 | 0.0211 | 0.0988 | 0.0049 | Anti-proliferative |
| hsa-miR-24-2*  | MI0000081 | UGCCUACUGAGCUGAAACACAG   | 0.7707 | 0.0094 | 0.4175 | 0.1048 | IR sensitizing     |
| hsa-miR-25     | MI0000082 | CAUUGCACUUGUCUCGGUCUGA   | 0.9853 | 0.0157 | 0.7765 | 0.0214 | —                  |
| hsa-miR-25*    | MI0000082 | AGGCGGAGACUUGGGCAAUUG    | 0.1479 | 0.0294 | 0.0311 | 0.0005 | Anti-proliferative |
| hsa-miR-26a    | MI0000750 | UUCAAGUAAUCCAGGAUAGGCU   | 0.3712 | 0.0566 | 0.0602 | 0.0013 | Anti-proliferative |
| hsa-miR-26a    | MI0000083 | UUCAAGUAAUCCAGGAUAGGCU   | 0.4137 | 0.0124 | 0.1526 | 0.0255 | Anti-proliferative |
| hsa-miR-26a-1* | MI0000083 | CCUAUUCUUGGUUACUUGCAGC   | 0.8842 | 0.0107 | 3.8351 | 0.5408 | IR protective      |
| hsa-miR-26a-2* | MI0000750 | CCUAUUCUUGAUUACUUGUUUC   | 0.9425 | 0.0240 | 3.5034 | 0.7091 | IR protective      |
| hsa-miR-26b    | MI0000084 | UUCAAGUAAUCCAGGAUAGGU    | 0.7972 | 0.0182 | 0.3590 | 0.0238 | IR sensitizing     |
| hsa-miR-26b*   | MI0000084 | CCUGUUCUCAUUCUUGGCUC     | 0.7031 | 0.0184 | 0.3014 | 0.0156 | IR sensitizing     |
| hsa-miR-27a    | MI0000085 | UUCACAGUGGCUAAGUUCGCG    | 0.8556 | 0.0157 | 0.4383 | 0.0254 | IR sensitizing     |
| hsa-miR-27a*   | MI0000085 | AGGCUUAGCUGUCUGGAGCA     | 0.5316 | 0.0114 | 0.0932 | 0.0064 | IR sensitizing     |
| hsa-miR-27b    | MI0000440 | UUCACAGUGGCUAAGUUCGCG    | 0.6795 | 0.0270 | 0.2697 | 0.0285 | IR sensitizing     |
| hsa-miR-27b*   | MI0000440 | AGAGCUUAGCUGAUUGGUGAAC   | 1.0592 | 0.0147 | 0.6064 | 0.0457 | —                  |
| hsa-miR-28     | MI0000086 | AAGGAGCUCACAGUCUAUUGAG   | 0.6853 | 0.0033 | 0.1220 | 0.0147 | IR sensitizing     |
| hsa-miR-28-3p  | MI0000086 | CACUAGAUUGUGAGCUCCUGGA   | 0.4953 | 0.0614 | 0.1655 | 0.0028 | Anti-proliferative |
| hsa-miR-296    | MI0000747 | AGGGCCCCCUCUAAUCUGU      | 0.5186 | 0.0124 | 0.0988 | 0.0070 | IR sensitizing     |
| hsa-miR-296-3p | MI0000747 | GAGGUUUGGGUGGAGGCUCUCC   | 0.7414 | 0.0187 | 0.7000 | 0.0628 | —                  |
| hsa-miR-297    | MI0005775 | AUGUAUGUGUGCAUGUGCAUG    | 0.5704 | 0.0056 | 0.0825 | 0.0047 | IR sensitizing     |
| hsa-miR-298    | MI0005523 | AGCAGAAGCAGGGAGGUUCUCCA  | 0.8404 | 0.0139 | 0.3962 | 0.0450 | IR sensitizing     |
| hsa-miR-299-3p | MI0000744 | UAUGUGGGAUGGUAAAACCGCUU  | 0.1463 | 0.0319 | 0.0570 | 0.0065 | Anti-proliferative |
| hsa-miR-299-5p | MI0000744 | UGGUUUACCGUCCACAUAUACU   | 0.3067 | 0.0187 | 0.0869 | 0.0044 | Anti-proliferative |
| hsa-miR-29a    | MI0000087 | UAGCACCAUCUGAAUUCGGUUA   | 0.4487 | 0.0227 | 0.0832 | 0.0126 | Anti-proliferative |
| hsa-miR-29a*   | MI0000087 | ACUGAUUCUUAUUGGUUUCAG    | 0.8005 | 0.0248 | 0.7675 | 0.0362 | —                  |
| hsa-miR-29b    | MI0000105 | UAGCACCAUUAUUGAAUUCAGUU  | 0.8178 | 0.0055 | 1.8440 | 0.0362 | —                  |
| hsa-miR-29b    | MI0000107 | UAGCACCAUUAUUGAAUUCAGUU  | 0.7936 | 0.0088 | 1.8495 | 0.0260 | —                  |
| hsa-miR-29b-1* | MI0000105 | GCUGGUUUCAUAUGGUGGUUAGA  | 0.7185 | 0.0237 | 0.3630 | 0.0345 | IR sensitizing     |
| hsa-miR-29b-2* | MI0000107 | CUGGUUUCACAUGGUGGCUUAG   | 0.7176 | 0.0179 | 0.2194 | 0.0309 | IR sensitizing     |
| hsa-miR-29c    | MI0000735 | UAGCACCAUUAUUGAAUUCGGUUA | 0.3554 | 0.0177 | 0.0598 | 0.0066 | Anti-proliferative |
| hsa-miR-29c*   | MI0000735 | UGACCAUUAUUCUCCUGGUUUC   | 0.6483 | 0.0026 | 0.2151 | 0.0364 | IR sensitizing     |
| hsa-miR-300    | MI0005525 | UAUACAAGGGCAGACUCUCUCU   | 0.7892 | 0.0117 | 0.8655 | 0.2202 | —                  |
| hsa-miR-301    | MI0000745 | CAGUGCAAUAGUAUUGUCAAAAGC | 0.7906 | 0.0278 | 0.1390 | 0.0044 | IR sensitizing     |
| hsa-miR-301b   | MI0005568 | CAGUGCAAUAGUAUUGUCAAAAGC | 0.9298 | 0.0053 | 0.4716 | 0.0266 | IR sensitizing     |
| hsa-miR-302a   | MI0000738 | UAAGUGCUUCCAUGUUUUGGUGA  | 0.7384 | 0.0423 | 1.1324 | 0.0790 | —                  |
| hsa-miR-302a*  | MI0000738 | ACUUAACGUGGAGUUAUUGCU    | 0.9927 | 0.0200 | 2.1893 | 0.0699 | IR protective      |
| hsa-miR-302b   | MI0000772 | UAAGUGCUUCCAUGUUUUGGUGA  | 0.7365 | 0.0035 | 0.9753 | 0.0055 | —                  |
| hsa-miR-302b*  | MI0000772 | ACUUAACAUGGAAGUGCUUUC    | 0.9703 | 0.0214 | 2.0736 | 0.0901 | IR protective      |
| hsa-miR-302c   | MI0000773 | UAAGUGCUUCCAUGUUUUGGUGG  | 0.7387 | 0.0094 | 0.9733 | 0.0115 | —                  |
| hsa-miR-302c*  | MI0000773 | UUUAACAUGGGGUACCGUCUG    | 0.7561 | 0.0067 | 1.1662 | 0.0394 | —                  |
| hsa-miR-302d   | MI0000774 | UAAGUGCUUCCAUGUUUUGGUGU  | 0.7358 | 0.0040 | 0.9863 | 0.0740 | —                  |
| hsa-miR-302d*  | MI0000774 | ACUUAACAUGGAGGCACUUGC    | 0.8092 | 0.0071 | 0.5702 | 0.0112 | —                  |
| hsa-miR-30a-3p | MI0000088 | CUUUCAGUCGGAUGUUUUGCAGC  | 0.8890 | 0.0120 | 0.2354 | 0.0667 | IR sensitizing     |
| hsa-miR-30a-5p | MI0000088 | UGUAAACAUCUCCGACUGGAAG   | 0.3342 | 0.0422 | 0.0940 | 0.0070 | Anti-proliferative |
| hsa-miR-30b    | MI0000441 | UGUAAACAUCUCCGACUCAGCU   | 0.4822 | 0.0016 | 0.1182 | 0.0083 | Anti-proliferative |
| hsa-miR-30b*   | MI0000441 | CUGGGAGGUGGAUGUUUACUUC   | 0.1087 | 0.0184 | 0.0585 | 0.0061 | Anti-proliferative |
| hsa-miR-30c    | MI0000736 | UGUAAACAUCUCCGACUCAGC    | 0.9633 | 0.0112 | 3.1998 | 0.5900 | IR protective      |
| hsa-miR-30c    | MI0000254 | UGUAAACAUCUCCGACUCAGC    | 0.4579 | 0.0718 | 0.1150 | 0.0123 | Anti-proliferative |
| hsa-miR-30c-1* | MI0000736 | CUGGGAGGUGGUUUUACUCC     | 0.2166 | 0.0078 | 0.0648 | 0.0044 | Anti-proliferative |
| hsa-miR-30c-2* | MI0000254 | CUGGGAGAAGGCUGUUUACUCU   | 0.2768 | 0.0148 | 0.0993 | 0.0331 | Anti-proliferative |
| hsa-miR-30d    | MI0000255 | UGUAAACAUCUCCGACUGGAAG   | 0.5156 | 0.0186 | 0.2170 | 0.0104 | IR sensitizing     |
| hsa-miR-30d*   | MI0000255 | CUUUCAGUCAGAUGUUUUGCUGC  | 0.7844 | 0.0264 | 0.2260 | 0.0453 | IR sensitizing     |
| hsa-miR-30e-3p | MI0000749 | CUUUCAGUCGGAUGUUUACAGC   | 0.7817 | 0.0022 | 0.6186 | 0.0902 | —                  |
| hsa-miR-30e-5p | MI0000749 | UGUAAACAUCUCCGACUGGAAG   | 0.6875 | 0.0411 | 0.1747 | 0.0221 | IR sensitizing     |
| hsa-miR-31     | MI0000089 | AGGCAAGAUGCUGGCAUAGCU    | 0.7208 | 0.0090 | 0.5533 | 0.0919 | —                  |
| hsa-miR-31*    | MI0000089 | UGCUAUGCCAACAUAUUGCCAU   | 0.5977 | 0.0065 | 2.3161 | 0.4223 | IR protective      |
| hsa-miR-32     | MI0000090 | UAUUGCACAUUACUAAGUUGCA   | 0.8066 | 0.0069 | 0.9308 | 0.0397 | —                  |
| hsa-miR-32*    | MI0000090 | CAUUUAGUGUGUGAUUUUU      | 0.5427 | 0.0096 | 0.0634 | 0.0029 | IR sensitizing     |
| hsa-miR-320    | MI0000542 | AAAAGCUGGGUUGAGAGGCGCA   | 0.6822 | 0.0025 | 0.5645 | 0.1116 | —                  |
| hsa-miR-323    | MI0000807 | CACAUUACACGGUCAGCCUCU    | 0.6604 | 0.0280 | 0.0424 | 0.0022 | IR sensitizing     |
| hsa-miR-323-5p | MI0000807 | AGGUGUCCGUGGCGGCUUCGC    | 0.2898 | 0.0288 | 0.1457 | 0.0357 | Anti-proliferative |
| hsa-miR-324-3p | MI0000813 | ACUGCCCCAGGUGCUGCUGG     | 0.6698 | 0.0102 | 0.6562 | 0.0889 | —                  |

|                |           |                         |        |        |        |        |                    |
|----------------|-----------|-------------------------|--------|--------|--------|--------|--------------------|
| hsa-miR-324-5p | MI0000813 | CGCAUCCCCUAGGGCAUUGGUGU | 1.0619 | 0.0339 | 2.6122 | 0.0979 | IR protective      |
| hsa-miR-325    | MI0000824 | CCUAGUAGGUGUCCAGUAAGUGU | 1.0623 | 0.0178 | 2.9418 | 0.3339 | IR protective      |
| hsa-miR-326    | MI0000808 | CCUCUGGGCCUUCUCCAG      | 0.7853 | 0.0140 | 0.1356 | 0.0288 | IR sensitizing     |
| hsa-miR-328    | MI0000804 | CUGGCCUCUCUGCCUUCGGU    | 0.8115 | 0.0068 | 0.2910 | 0.0496 | IR sensitizing     |
| hsa-miR-329    | MI0001726 | AACACACCUGGUUAACCUCUUU  | 1.1717 | 0.0574 | 0.1373 | 0.0234 | IR sensitizing     |
| hsa-miR-329    | MI0001725 | AACACACCUGGUUAACCUCUUU  | 0.9473 | 0.0378 | 0.2880 | 0.0215 | IR sensitizing     |
| hsa-miR-33     | MI0000091 | GUGCAUUGUAGUUGCAUUGCA   | 0.6470 | 0.0034 | 0.4414 | 0.0691 | IR sensitizing     |
| hsa-miR-330    | MI0000803 | GCAAAGCACACGGCCUGCAGAGA | 0.9970 | 0.0112 | 1.1123 | 0.2400 | —                  |
| hsa-miR-330-5p | MI0000803 | UCUCUGGGCCUGUGUCUAGGC   | 0.5071 | 0.0536 | 0.1645 | 0.0253 | IR sensitizing     |
| hsa-miR-331    | MI0000812 | GCCCCUGGGCCUAUCCUAGAA   | 0.7634 | 0.0016 | 1.6484 | 0.0252 | —                  |
| hsa-miR-331-5p | MI0000812 | CUAGGUAUGGUCACAGGGAUCC  | 0.9467 | 0.0235 | 0.8258 | 0.0365 | —                  |
| hsa-miR-335    | MI0000816 | UCAAGAGCAAUAACGAAAAUGU  | 0.8764 | 0.0068 | 1.9688 | 0.1764 | —                  |
| hsa-miR-335*   | MI0000816 | UUUUUCAUUUUGCCUCCAGCC   | 0.7115 | 0.0192 | 0.1986 | 0.0168 | IR sensitizing     |
| hsa-miR-337    | MI0000806 | CUCCUAUUGAUGCCUUCUUC    | 0.7345 | 0.0181 | 0.9585 | 0.1114 | —                  |
| hsa-miR-337-5p | MI0000806 | GAACGGCUUCAACAGGAGUU    | 0.8500 | 0.0075 | 0.7441 | 0.0795 | —                  |
| hsa-miR-338    | MI0000814 | UCCAGCAUCAGUGAUUUUGUUG  | 0.7133 | 0.0172 | 0.3240 | 0.0858 | IR sensitizing     |
| hsa-miR-338-5p | MI0000814 | AACAUAUCCUGGUGCUGAGUG   | 0.8295 | 0.0077 | 1.4913 | 0.0986 | —                  |
| hsa-miR-339    | MI0000815 | UCCUGUCCUCCAGGAGCUCACG  | 0.8039 | 0.0098 | 0.4180 | 0.0150 | IR sensitizing     |
| hsa-miR-339-3p | MI0000815 | UGAGCGCCUCGACGACAGCCGG  | 0.4785 | 0.0148 | 0.2259 | 0.0177 | Anti-proliferative |
| hsa-miR-33a*   | MI0000091 | CAAUGUUCACACAGUACUAC    | 0.8404 | 0.0405 | 0.4117 | 0.0195 | IR sensitizing     |
| hsa-miR-33b    | MI0003646 | GUGCAUUGCUGUUGCAUUGC    | 0.6425 | 0.0055 | 0.3032 | 0.0506 | IR sensitizing     |
| hsa-miR-33b*   | MI0003646 | CAGUGCCUCGCGAGUGCAGCCC  | 0.9768 | 0.0080 | 1.7499 | 0.1021 | —                  |
| hsa-miR-340    | MI0000802 | UUUAAAAGCAAUGAGACUGAUU  | 0.6925 | 0.0137 | 0.2293 | 0.0398 | IR sensitizing     |
| hsa-miR-340*   | MI0000802 | UCCGUCUCAGUUACUUUAUAGC  | 0.6372 | 0.0056 | 0.1367 | 0.0135 | IR sensitizing     |
| hsa-miR-342    | MI0000805 | UCUCACACAGAAUCCGACCCCGU | 0.7812 | 0.0182 | 1.6120 | 0.0474 | —                  |
| hsa-miR-342-5p | MI0000805 | AGGGGUGCUAUCUGUAUUGA    | 0.0672 | 0.0024 | 0.1026 | 0.0143 | Anti-proliferative |
| hsa-miR-345    | MI0000825 | GCUGACUCCUAGUCCAGGGCUC  | 1.0891 | 0.0598 | 5.5600 | 0.7885 | IR protective      |
| hsa-miR-346    | MI0000826 | UGUCUGCCCGAUGCCUGCCUCU  | 0.8484 | 0.0198 | 0.3433 | 0.0612 | IR sensitizing     |
| hsa-miR-34a    | MI0000268 | UGGCAGUGUCUAGCUGGUUUGU  | 0.2667 | 0.0304 | 0.0891 | 0.0151 | Anti-proliferative |
| hsa-miR-34a*   | MI0000268 | CAAUCAGCAAGUAUACUGCCCU  | 0.7196 | 0.0242 | 0.0680 | 0.0147 | IR sensitizing     |
| hsa-miR-34b    | MI0000742 | CAAUCACUAACUCCUCCUCCAU  | 0.7942 | 0.0396 | 0.9920 | 0.1351 | —                  |
| hsa-miR-34b*   | MI0000742 | UAGGCAGUGUAUUAGCUGAUUG  | 0.1111 | 0.0293 | 0.0598 | 0.0018 | Anti-proliferative |
| hsa-miR-34c    | MI0000743 | AGGCAGUGUAGUUAGCUGAUUGC | 0.0338 | 0.0095 | 0.0307 | 0.0032 | Anti-proliferative |
| hsa-miR-34c-3p | MI0000743 | AAUCACUAACCACACGGCCAGG  | 0.8070 | 0.0194 | 1.1380 | 0.1890 | —                  |
| hsa-miR-361    | MI0000760 | UUUAUCAGAAUCUCCAGGGGUAC | 0.7235 | 0.0102 | 1.0170 | 0.0720 | —                  |
| hsa-miR-361-3p | MI0000760 | UCCCCCAGGUGUGAUUCUGAUUU | 0.7810 | 0.0129 | 0.8089 | 0.0388 | —                  |
| hsa-miR-362    | MI0000762 | AAUCCUUGGAACUAGGUGUGAGU | 0.6802 | 0.0102 | 0.1091 | 0.0068 | IR sensitizing     |
| hsa-miR-362-3p | MI0000762 | AACACACCUAUUCAAGGAUUCA  | 0.5987 | 0.0031 | 0.1801 | 0.0171 | IR sensitizing     |
| hsa-miR-363    | MI0000764 | AAUUGCACGGUAUCCAUCUGUA  | 1.0002 | 0.0246 | 1.7715 | 0.2485 | —                  |
| hsa-miR-363*   | MI0000764 | CGGGUGGAUCACGAUGCAAUUU  | 0.3956 | 0.1047 | 0.0545 | 0.0038 | Anti-proliferative |
| hsa-miR-365    | MI0000769 | UAAUGCCCCUAAAAUCCUUUU   | 0.7540 | 0.0240 | 0.3213 | 0.0308 | IR sensitizing     |
| hsa-miR-365    | MI0000767 | UAAUGCCCCUAAAAUCCUUUU   | 0.7982 | 0.0457 | 0.3419 | 0.1037 | IR sensitizing     |
| hsa-miR-367    | MI0000775 | AAUUGCACUUUAGCAUUGGUGA  | 0.7129 | 0.0064 | 1.2113 | 0.0143 | —                  |
| hsa-miR-367*   | MI0000775 | ACUGUUGCUAAUAUGCAACUCU  | 0.6380 | 0.0116 | 0.0889 | 0.0126 | IR sensitizing     |
| hsa-miR-368    | MI0000776 | AACAUAGAGGAAAUUCCACGU   | 0.5459 | 0.0280 | 0.0483 | 0.0027 | IR sensitizing     |
| hsa-miR-369-3p | MI0000777 | AAUAUAACAUGGUUGAUUCUUU  | 0.7892 | 0.0383 | 1.0753 | 0.0353 | —                  |
| hsa-miR-369-5p | MI0000777 | AGAUCGACCGUGUUUAUUCGC   | 1.1424 | 0.0157 | 4.2064 | 0.0948 | IR protective      |
| hsa-miR-370    | MI0000778 | GCCUGCUGGGUGGAACCUCCGU  | 0.6901 | 0.0086 | 0.7128 | 0.0607 | —                  |
| hsa-miR-371    | MI0000779 | AAGUCCCGCAUCUUAUGAGUGU  | 0.5925 | 0.0202 | 0.2163 | 0.0220 | IR sensitizing     |
| hsa-miR-371-5p | MI0000779 | ACUCAAACUGUGGGGGCACU    | 0.9237 | 0.0105 | 2.4737 | 0.6890 | IR protective      |
| hsa-miR-372    | MI0000780 | AAAGUCUGCGACAUUUGAGCGU  | 0.8707 | 0.0241 | 0.5414 | 0.0194 | —                  |
| hsa-miR-373    | MI0000781 | GAAGUCUUCGAUUUUGGGGUGU  | 0.7551 | 0.0391 | 0.4346 | 0.0055 | IR sensitizing     |
| hsa-miR-373*   | MI0000781 | ACUCAAAUUGGGGGCGCUUCC   | 0.8890 | 0.0279 | 1.2388 | 0.0577 | —                  |
| hsa-miR-374    | MI0000782 | UUUAUAUAACAACUGAUUAGUG  | 0.6917 | 0.0270 | 0.3513 | 0.0816 | IR sensitizing     |
| hsa-miR-374a*  | MI0000782 | CUUAUCAGAUUGUAUUUGAAUU  | 0.8159 | 0.0139 | 2.0573 | 0.2078 | IR protective      |
| hsa-miR-374b   | MI0005566 | AUAUAUAACAACCGCUAAGUG   | 0.7118 | 0.0143 | 0.1467 | 0.0135 | IR sensitizing     |
| hsa-miR-374b*  | MI0005566 | CUUAGCAGGUUGUAUUUAUCAUU | 0.6648 | 0.0020 | 0.1282 | 0.0146 | IR sensitizing     |
| hsa-miR-375    | MI0000783 | UUUGUUCGUUCGGCUCGCGUGA  | 0.6818 | 0.0055 | 0.2955 | 0.0176 | IR sensitizing     |
| hsa-miR-376a   | MI0000784 | AUCAUAGAGGAAAUAUCCACGU  | 0.6894 | 0.0300 | 0.1470 | 0.0282 | IR sensitizing     |
| hsa-miR-376a   | MI0003529 | AUCAUAGAGGAAAUAUCCACGU  | 0.7697 | 0.0222 | 0.1548 | 0.0217 | IR sensitizing     |
| hsa-miR-376a*  | MI0000784 | GUAGAUUCUCCUUCUUAUGAGUA | 0.6199 | 0.0031 | 0.2053 | 0.0311 | IR sensitizing     |
| hsa-miR-376b   | MI0002466 | AUCAUAGAGGAAAUAUCCUUGUU | 0.6422 | 0.3699 | 0.5357 | 0.1057 | —                  |
| hsa-miR-377    | MI0000785 | AUCACACAAAGGCAACUUUUGU  | 0.7637 | 0.0350 | 0.6916 | 0.0255 | —                  |
| hsa-miR-377*   | MI0000785 | AGAGGUUGCCUUGGUGAAUUC   | 0.4990 | 0.0197 | 0.1815 | 0.0261 | Anti-proliferative |
| hsa-miR-378    | MI0000786 | CUCCUGACUCCAGGACCUUGUGU | 0.2682 | 0.0122 | 0.0673 | 0.0131 | Anti-proliferative |
| hsa-miR-379    | MI0000787 | UGGUAGACUAUGGUAACGUAGU  | 0.7183 | 0.0142 | 0.2022 | 0.0107 | IR sensitizing     |
| hsa-miR-379*   | MI0000787 | UAUGUAACAUGGUCCACUAAACU | 0.7812 | 0.0178 | 1.1058 | 0.1554 | —                  |
| hsa-miR-380-3p | MI0000788 | UAUGUAUAUGGUCCACUACUU   | 0.7883 | 0.0064 | 0.2017 | 0.0162 | IR sensitizing     |



|                 |           |                         |        |        |        |        |                    |
|-----------------|-----------|-------------------------|--------|--------|--------|--------|--------------------|
| hsa-miR-380-5p  | MI0000788 | UGGUUGACCAUAGAACAUGCGC  | 0.4649 | 0.0134 | 0.0705 | 0.0061 | Anti-proliferative |
| hsa-miR-381     | MI0000789 | UAUACAAGGGCAAGCUCUCUGU  | 1.0668 | 0.0135 | 3.2926 | 0.4336 | IR protective      |
| hsa-miR-382     | MI0000790 | GAAGUUGUUCGUGGUGGAUUCG  | 0.8848 | 0.0124 | 0.5087 | 0.0527 | —                  |
| hsa-miR-383     | MI0000791 | AGAUCAGAAGGUGAUUGUGGCU  | 0.9226 | 0.0053 | 0.1413 | 0.0182 | IR sensitizing     |
| hsa-miR-384     | MI0001145 | AUUCUAGAAAUGUUCUAUA     | 0.8937 | 0.0117 | 1.1252 | 0.1474 | —                  |
| hsa-miR-409-3p  | MI0001735 | GAAUGUUGCUCGGUGAACCCCU  | 0.8791 | 0.0288 | 0.7930 | 0.1774 | —                  |
| hsa-miR-409-5p  | MI0001735 | AGGUUACCCGAGCAACUUUGCAU | 0.8874 | 0.0264 | 1.3323 | 0.2365 | —                  |
| hsa-miR-410     | MI0002465 | AAUAUAACACAGAUUGCCUGU   | 1.2396 | 0.0469 | 1.6677 | 0.1026 | —                  |
| hsa-miR-411     | MI0003675 | UAGUAGACCGUAUAGCGUACG   | 0.6810 | 0.0156 | 0.1714 | 0.0257 | IR sensitizing     |
| hsa-miR-411*    | MI0003675 | UAUGUAACACGGUCCACUAACC  | 0.6897 | 0.0453 | 0.7192 | 0.0539 | —                  |
| hsa-miR-412     | MI0002464 | ACUUCACCUUGUCCACUAGCCGU | 1.1815 | 0.0210 | 3.2521 | 0.3003 | IR protective      |
| hsa-miR-421     | MI0003685 | AUCAACAGACAUAAUUGGGCGC  | 0.6503 | 0.0206 | 0.1466 | 0.0044 | IR sensitizing     |
| hsa-miR-422a    | MI0001444 | ACUGGACUJAGGGUCAGAAGGC  | 0.7940 | 0.0321 | 0.2386 | 0.0391 | IR sensitizing     |
| hsa-miR-422b    | MI0000786 | ACUGGACUJGGAGUCAGAAGG   | 0.6788 | 0.0410 | 0.4399 | 0.0297 | IR sensitizing     |
| hsa-miR-423     | MI0001445 | AGCUCGGUCUGAGGCCCCUCAGU | 0.6857 | 0.0423 | 0.3875 | 0.1104 | IR sensitizing     |
| hsa-miR-423-5p  | MI0001445 | UGAGGGGCAGAGAGCGAGACUUU | 0.3975 | 0.0340 | 0.5479 | 0.0592 | Anti-proliferative |
| hsa-miR-424     | MI0001446 | CAGCAGCAAUUCAUUUUGAA    | 0.2519 | 0.0209 | 0.1012 | 0.0055 | Anti-proliferative |
| hsa-miR-424*    | MI0001446 | CAAAACGUGAGGCGCUGCAU    | 0.6483 | 0.0584 | 0.2811 | 0.0099 | IR sensitizing     |
| hsa-miR-425     | MI0001448 | AUCGGGAUUGCUGUCCGCCCC   | 0.8161 | 0.0175 | 0.6238 | 0.1147 | —                  |
| hsa-miR-425-5p  | MI0001448 | AAUGACAGAUCAUCCCGUUGA   | 0.3544 | 0.0023 | 0.1502 | 0.0035 | Anti-proliferative |
| hsa-miR-429     | MI0001641 | UAAUACUGUCUGGUAACCCGU   | 0.8327 | 0.0057 | 1.9271 | 0.0480 | —                  |
| hsa-miR-431     | MI0001721 | UGUCUUGCAGGCCGUC AUGCA  | 1.0240 | 0.0292 | 0.3906 | 0.0182 | IR sensitizing     |
| hsa-miR-431*    | MI0001721 | CAGGUCGUCUUGCAGGCCUUCU  | 0.7000 | 0.0064 | 0.3120 | 0.0525 | IR sensitizing     |
| hsa-miR-432     | MI0003133 | UCUUGGAGUAGGUCUAUUGGGUG | 0.5607 | 0.3146 | 0.4984 | 0.1154 | IR sensitizing     |
| hsa-miR-432*    | MI0003133 | CUGGAGGUCUCCUACUAGUCU   | 1.0524 | 0.0072 | 3.8939 | 0.0797 | IR protective      |
| hsa-miR-433     | MI0001723 | AUCAUGAUGGGCUCCUGGUGU   | 0.9573 | 0.0150 | 1.5129 | 0.0896 | —                  |
| hsa-miR-448     | MI0001637 | UUGCAUAUGUAGGAUGUCCCAU  | 0.9678 | 0.0083 | 0.1416 | 0.0112 | IR sensitizing     |
| hsa-miR-449     | MI0001648 | UGGAGUGUAUUGUUAAGCUGGU  | 0.1028 | 0.0304 | 0.0498 | 0.0017 | Anti-proliferative |
| hsa-miR-449b    | MI0003673 | AGGCAGUGUAUUGUUAAGCUGGC | 0.0405 | 0.0070 | 0.0445 | 0.0015 | Anti-proliferative |
| hsa-miR-450     | MI0003187 | UUUUGCGAUGUGUCCUAUAU    | 0.7110 | 0.0074 | 0.8752 | 0.1543 | —                  |
| hsa-miR-450     | MI0001652 | UUUUGCGAUGUGUCCUAUAU    | 0.6683 | 0.0098 | 0.9284 | 0.1444 | —                  |
| hsa-miR-450b-3p | MI0005531 | UUGGGAUCAUUUGCAUCCAUA   | 0.8059 | 0.0354 | 0.1829 | 0.0111 | IR sensitizing     |
| hsa-miR-450b-5p | MI0005531 | UUUUGCAUAUUGUCCUGAAUA   | 0.8114 | 0.0487 | 0.5723 | 0.0655 | —                  |
| hsa-miR-451     | MI0001729 | AAACCGUACCAUACUGAGUU    | 0.9698 | 0.0437 | 1.4441 | 0.0927 | —                  |
| hsa-miR-452     | MI0001733 | AACUGUUUGCAGAGGAAACUGA  | 0.7812 | 0.0112 | 0.8885 | 0.0764 | —                  |
| hsa-miR-452*    | MI0001733 | CUCAUCUGCAAAGAAGUAAGUG  | 0.8246 | 0.0076 | 0.1723 | 0.0201 | IR sensitizing     |
| hsa-miR-453     | MI0001727 | AGGUUGUCCGUGGUGAGUUCGCA | 0.6259 | 0.0588 | 0.1360 | 0.0214 | IR sensitizing     |
| hsa-miR-454-3p  | MI0003820 | UAGUGCAAUAUUGCUUAUAGGGU | 0.8097 | 0.0045 | 0.2775 | 0.0278 | IR sensitizing     |
| hsa-miR-454-5p  | MI0003820 | ACCCUAUCAUAUUGUCUCUGC   | 0.8259 | 0.0062 | 0.5963 | 0.0183 | —                  |
| hsa-miR-455     | MI0003513 | UAUGUGCCUUGGACUACAUCG   | 0.9443 | 0.0050 | 2.2518 | 0.0449 | IR protective      |
| hsa-miR-455-3p  | MI0003513 | GCAGUCCAUGGGCAUAUACAC   | 0.8003 | 0.0092 | 1.8879 | 0.3174 | —                  |
| hsa-miR-483     | MI0002467 | UCACUCCUCUCCUCCGCUU     | 0.9341 | 0.0249 | 0.9446 | 0.2358 | —                  |
| hsa-miR-483-5p  | MI0002467 | AAGACGGGAGGAAAGAGGGAG   | 0.6595 | 0.0196 | 0.4892 | 0.0409 | IR sensitizing     |
| hsa-miR-484     | MI0002468 | UCAGGCUCAGUCCCUCCCGAU   | 1.1001 | 0.0187 | 1.1478 | 0.1968 | —                  |
| hsa-miR-485-3p  | MI0002469 | GUCAUACACGGCUCUCCUCUCU  | 1.0957 | 0.0099 | 0.7378 | 0.0493 | —                  |
| hsa-miR-485-5p  | MI0002469 | AGAGGCUGGCCGUGAUGAAUUC  | 0.5343 | 0.0401 | 0.1239 | 0.0056 | IR sensitizing     |
| hsa-miR-486     | MI0002470 | UCCUGUACUGAGCUGCCCGAG   | 1.0456 | 0.0204 | 1.5817 | 0.0471 | —                  |
| hsa-miR-486-3p  | MI0002470 | CGGGCAGCUCAGUACAGGAU    | 0.6170 | 0.0117 | 0.0967 | 0.0081 | IR sensitizing     |
| hsa-miR-487     | MI0002471 | AAUCAUACAGGGACUCCAGUU   | 0.8891 | 0.0194 | 0.6297 | 0.0457 | —                  |
| hsa-miR-487b    | MI0003530 | AAUCGUACAGGGUCAUCCACUU  | 0.8524 | 0.0117 | 0.2625 | 0.0465 | IR sensitizing     |
| hsa-miR-488     | MI0003123 | UUGAAAGGCUAUUUCUUGGUC   | 0.6810 | 0.0173 | 0.1839 | 0.0142 | IR sensitizing     |
| hsa-miR-488*    | MI0003123 | CCAGAUAAUGGCACUCUCA     | 0.5267 | 0.0432 | 0.0947 | 0.0084 | IR sensitizing     |
| hsa-miR-489     | MI0003124 | GUGACAUCACAUUACGGCAGC   | 0.2339 | 0.0336 | 0.0664 | 0.0034 | Anti-proliferative |
| hsa-miR-490     | MI0003125 | CAACUGGAGGACUCCAGCUG    | 0.8370 | 0.0103 | 0.5056 | 0.0296 | —                  |
| hsa-miR-490-5p  | MI0003125 | CCAUGGAUCUCCAGUGGGU     | 0.6066 | 0.0120 | 0.4238 | 0.0247 | IR sensitizing     |
| hsa-miR-491     | MI0003126 | AGUGGGGAACCCUCCAUGAGG   | 0.6690 | 0.0282 | 0.1739 | 0.0428 | IR sensitizing     |
| hsa-miR-491-3p  | MI0003126 | CUUAUGCAAGAUUCCUUCUAC   | 0.8107 | 0.0241 | 0.3172 | 0.0155 | IR sensitizing     |
| hsa-miR-492     | MI0003131 | AGGACCUGCGGGACAAGAUUCUU | 0.8874 | 0.0186 | 0.5068 | 0.0741 | —                  |
| hsa-miR-493     | MI0003132 | UUGUACAUGGUAGGCUUCCAUG  | 0.6948 | 0.0501 | 0.1850 | 0.0174 | IR sensitizing     |
| hsa-miR-493-3p  | MI0003132 | UGAAGGUCUACUGUGUGCCAGG  | 0.8973 | 0.0211 | 1.1629 | 0.1847 | —                  |
| hsa-miR-494     | MI0003134 | UGAAACAUAACCGGAAACCCUC  | 0.7433 | 0.0125 | 0.2947 | 0.0755 | IR sensitizing     |
| hsa-miR-495     | MI0003135 | AAACAACAUGGUGCACUUCUU   | 0.8821 | 0.0174 | 4.2017 | 0.5922 | IR protective      |
| hsa-miR-496     | MI0003136 | UGAGUAUACAUGGCCAUCUC    | 0.6654 | 0.0318 | 0.2846 | 0.0470 | IR sensitizing     |
| hsa-miR-497     | MI0003138 | CAGCAGCACACUGGGUUUGU    | 0.1585 | 0.0151 | 0.0746 | 0.0033 | Anti-proliferative |
| hsa-miR-497*    | MI0003138 | CAAAACCACUGGGUGUUAGA    | 0.7026 | 0.0210 | 0.5060 | 0.0582 | —                  |
| hsa-miR-498     | MI0003142 | UUUCAAGCCAGGGGCGUUUUUC  | 0.7432 | 0.0210 | 0.3820 | 0.0170 | IR sensitizing     |
| hsa-miR-499     | MI0003183 | UUAAGACUJGGAGUAGUUUU    | 0.7906 | 0.0112 | 0.3561 | 0.0627 | IR sensitizing     |
| hsa-miR-499-3p  | MI0003183 | AACAUCACAGCAAGUCUGUGCU  | 0.4860 | 0.0443 | 0.0907 | 0.0072 | Anti-proliferative |

|                  |           |                          |        |        |        |        |                    |
|------------------|-----------|--------------------------|--------|--------|--------|--------|--------------------|
| hsa-miR-500      | MI0003184 | UAAUCCUUGCUACCCUGGGUGAGA | 0.7435 | 0.0011 | 0.4037 | 0.0077 | IR sensitizing     |
| hsa-miR-500*     | MI0003184 | AUGCACCCUGGGCAAGGAUUCUG  | 0.8974 | 0.0163 | 0.7622 | 0.0465 | —                  |
| hsa-miR-501      | MI0003185 | AAUCCUUUGUCCUGGGUGAGA    | 0.9441 | 0.0094 | 2.3920 | 0.0912 | IR protective      |
| hsa-miR-501-3p   | MI0003185 | AAUGCACCCGGGCAAGGAUUCU   | 0.7725 | 0.0093 | 0.4388 | 0.0085 | IR sensitizing     |
| hsa-miR-502      | MI0003186 | AUCCUUGCUAUCUGGGUGCUA    | 0.9502 | 0.0164 | 2.5154 | 0.0730 | IR protective      |
| hsa-miR-502-3p   | MI0003186 | AAUGCACCCUGGGCAAGGAUUCU  | 0.6584 | 0.0301 | 0.1901 | 0.0122 | IR sensitizing     |
| hsa-miR-503      | MI0003188 | UAGCAGCGGGAACAGUUCUGCAG  | 0.9832 | 0.0119 | 2.4523 | 0.0649 | IR protective      |
| hsa-miR-504      | MI0003189 | AGACCCUGGUCUGCACUCUAUC   | 1.0856 | 0.0029 | 1.6433 | 0.3473 | —                  |
| hsa-miR-505      | MI0003190 | CGUCAACACUUGCUGGUUCCU    | 0.8878 | 0.0095 | 0.8676 | 0.0373 | —                  |
| hsa-miR-505*     | MI0003190 | GGGAGCCAGGAAGUAUUGAUGU   | 0.8983 | 0.0079 | 0.2728 | 0.0321 | IR sensitizing     |
| hsa-miR-506      | MI0003193 | UAAGGCACCCUUCUGAGUAGA    | 0.5543 | 0.0333 | 0.0803 | 0.0045 | IR sensitizing     |
| hsa-miR-507      | MI0003194 | UUUUGCACUUUUGGAGUGAA     | 0.7825 | 0.0055 | 0.3769 | 0.0166 | IR sensitizing     |
| hsa-miR-508      | MI0003195 | UGAUUGUAGCCUUUGAGUAGA    | 0.8740 | 0.0057 | 1.4288 | 0.1845 | —                  |
| hsa-miR-508-5p   | MI0003195 | UACUCCAGAGGGCUCUCUAUC    | 0.7548 | 0.0074 | 0.4269 | 0.0123 | IR sensitizing     |
| hsa-miR-509      | MI0003196 | UGAUUGGUACGUCUGGGUAG     | 0.6686 | 0.0364 | 0.1631 | 0.0229 | IR sensitizing     |
| hsa-miR-509-3-5p | MI0005717 | UACUGCAGACGUGGCAUCAUG    | 0.3154 | 0.0213 | 0.0711 | 0.0047 | Anti-proliferative |
| hsa-miR-509-3p   | MI0005530 | UGAUUGGUACGUCUGGGUAG     | 0.6987 | 0.0088 | 0.0829 | 0.0072 | IR sensitizing     |
| hsa-miR-509-3p   | MI0005717 | UGAUUGGUACGUCUGGGUAG     | 0.4994 | 0.0241 | 0.0912 | 0.0139 | Anti-proliferative |
| hsa-miR-509-5p   | MI0003196 | UACUGCAGACGUGGCAUCAUG    | 0.6565 | 0.0099 | 0.1109 | 0.0049 | IR sensitizing     |
| hsa-miR-509-5p   | MI0005530 | UACUGCAGACGUGGCAUCAUG    | 0.6132 | 0.0135 | 0.2031 | 0.0241 | IR sensitizing     |
| hsa-miR-510      | MI0003197 | UACUCAGGAGUGGCAUUCAC     | 0.3797 | 0.0141 | 0.0941 | 0.0279 | Anti-proliferative |
| hsa-miR-511      | MI0003128 | GUGUCUUUUGCUCUGCAGUCA    | 0.8739 | 0.0117 | 0.5457 | 0.0225 | —                  |
| hsa-miR-511      | MI0003127 | GUGUCUUUUGCUCUGCAGUCA    | 1.0914 | 0.0120 | 2.8442 | 0.1821 | IR protective      |
| hsa-miR-512-3p   | MI0003140 | AAGUCGUCUCAUAGCUGAGGUC   | 0.8856 | 0.0061 | 0.6092 | 0.0360 | —                  |
| hsa-miR-512-3p   | MI0003141 | AAGUCGUCUCAUAGCUGAGGUC   | 0.8972 | 0.0110 | 0.6399 | 0.0279 | —                  |
| hsa-miR-512-5p   | MI0003141 | CACUCAGCCUUGAGGGCACUUUC  | 1.0416 | 0.0055 | 3.3262 | 0.1569 | IR protective      |
| hsa-miR-512-5p   | MI0003140 | CACUCAGCCUUGAGGGCACUUUC  | 0.5616 | 0.0650 | 0.1510 | 0.0048 | IR sensitizing     |
| hsa-miR-513      | MI0003191 | UUCACAGGGAGGUGUCAU       | 0.8605 | 0.0186 | 0.5410 | 0.1058 | —                  |
| hsa-miR-513      | MI0003192 | UUCACAGGGAGGUGUCAU       | 0.7976 | 0.0375 | 0.8446 | 0.1911 | —                  |
| hsa-miR-513a-3p  | MI0003192 | UAAUUUCACCUUUCUGAGAAGG   | 0.5170 | 0.0117 | 0.0816 | 0.0023 | IR sensitizing     |
| hsa-miR-513a-3p  | MI0003191 | UAAUUUCACCUUUCUGAGAAGG   | 0.6303 | 0.0384 | 0.1115 | 0.0187 | IR sensitizing     |
| hsa-miR-513b     | MI0006648 | UUCACAAGGAGGUGUCAUUUAU   | 0.9137 | 0.0137 | 1.7566 | 0.0194 | —                  |
| hsa-miR-513c     | MI0006649 | UUCUCAAGGAGGUGUCUUUAU    | 1.0313 | 0.0723 | 0.4095 | 0.0132 | IR sensitizing     |
| hsa-miR-514      | MI0003199 | AUUGACACUUCUGUGAGUAGA    | 0.7565 | 0.0036 | 1.6949 | 0.2566 | —                  |
| hsa-miR-514      | MI0003200 | AUUGACACUUCUGUGAGUAGA    | 0.7103 | 0.0119 | 2.4265 | 0.3499 | IR protective      |
| hsa-miR-514      | MI0003198 | AUUGACACUUCUGUGAGUAGA    | 0.8253 | 0.0087 | 3.7086 | 0.5119 | IR protective      |
| hsa-miR-515-3p   | MI0003147 | GAGUGCCUUCUUUGGAGCGUU    | 0.7779 | 0.0138 | 0.5092 | 0.0793 | —                  |
| hsa-miR-515-3p   | MI0003144 | GAGUGCCUUCUUUGGAGCGUU    | 0.7533 | 0.0073 | 0.6548 | 0.1033 | —                  |
| hsa-miR-515-5p   | MI0003147 | UUCUCCAAAAGAAAGCACUUUCUG | 0.5560 | 0.3078 | 0.9750 | 0.0343 | —                  |
| hsa-miR-515-5p   | MI0003144 | UUCUCCAAAAGAAAGCACUUUCUG | 0.8860 | 0.0181 | 0.4687 | 0.1195 | IR sensitizing     |
| hsa-miR-516-3p   | MI0003180 | UGCUCUUUCAGAGGGU         | 0.8932 | 0.0036 | 0.6242 | 0.0528 | —                  |
| hsa-miR-516-3p   | MI0003172 | UGCUCUUUCAGAGGGU         | 0.5669 | 0.3135 | 2.5551 | 0.1291 | IR protective      |
| hsa-miR-516-3p   | MI0003167 | UGCUCUUUCAGAGGGU         | 0.8529 | 0.0210 | 0.2033 | 0.0126 | IR sensitizing     |
| hsa-miR-516-3p   | MI0003181 | UGCUCUUUCAGAGGGU         | 0.6805 | 0.0713 | 0.2239 | 0.0069 | IR sensitizing     |
| hsa-miR-516-5p   | MI0003172 | AUCUGGAGGUAAGAAGCACUUU   | 0.2144 | 0.0145 | 0.1426 | 0.0253 | Anti-proliferative |
| hsa-miR-516-5p   | MI0003167 | AUCUGGAGGUAAGAAGCACUUU   | 0.3409 | 0.0538 | 0.1123 | 0.0218 | Anti-proliferative |
| hsa-miR-516a-5p  | MI0003180 | UUCUCGAGGAAAGAAGCACUUUC  | 0.7827 | 0.0085 | 0.8819 | 0.2022 | —                  |
| hsa-miR-516a-5p  | MI0003181 | UUCUCGAGGAAAGAAGCACUUUC  | 0.7006 | 0.0074 | 0.3516 | 0.0708 | IR sensitizing     |
| hsa-miR-517*     | MI0003165 | CCUCUAGAUGGAAGCACUGUCU   | 0.9449 | 0.0156 | 0.7267 | 0.1038 | —                  |
| hsa-miR-517*     | MI0003174 | CCUCUAGAUGGAAGCACUGUCU   | 0.9309 | 0.0248 | 0.8625 | 0.0561 | —                  |
| hsa-miR-517*     | MI0003161 | CCUCUAGAUGGAAGCACUGUCU   | 0.9436 | 0.0104 | 1.0990 | 0.0562 | —                  |
| hsa-miR-517a     | MI0003161 | AUCGUGCAUCCUUUAGAGUGU    | 0.7709 | 0.0488 | 0.3399 | 0.0559 | IR sensitizing     |
| hsa-miR-517b     | MI0003165 | UCGUGCAUCCUUUAGAGUGU     | 0.9737 | 0.0309 | 0.1876 | 0.0104 | IR sensitizing     |
| hsa-miR-517c     | MI0003174 | AUCGUGCAUCCUUUAGAGUGU    | 0.6778 | 0.0619 | 0.1651 | 0.0137 | IR sensitizing     |
| hsa-miR-518a     | MI0003173 | GAAAGCGCUUCCUUUGCUGGA    | 0.5982 | 0.0336 | 0.2504 | 0.0507 | IR sensitizing     |
| hsa-miR-518a     | MI0003170 | GAAAGCGCUUCCUUUGCUGGA    | 0.6013 | 0.0220 | 0.4107 | 0.0840 | IR sensitizing     |
| hsa-miR-518a-5p  | MI0003170 | CUGCAAAGGGAAGCCUUUC      | 0.1745 | 0.0173 | 0.1342 | 0.0146 | Anti-proliferative |
| hsa-miR-518a-5p  | MI0003173 | CUGCAAAGGGAAGCCUUUC      | 0.2110 | 0.0103 | 0.1465 | 0.0210 | Anti-proliferative |
| hsa-miR-518b     | MI0003156 | CAAAGCGCUCCUUUAGAGGU     | 0.5793 | 0.0042 | 0.1397 | 0.0149 | IR sensitizing     |
| hsa-miR-518c     | MI0003159 | CAAAGCGCUUCCUUUAGAGGU    | 0.6253 | 0.0183 | 0.4060 | 0.0622 | IR sensitizing     |
| hsa-miR-518c*    | MI0003159 | UCUCUGGAGGGAAGCACUUUCUG  | 0.9459 | 0.0129 | 0.3840 | 0.0260 | IR sensitizing     |
| hsa-miR-518d     | MI0003171 | CAAAGCGCUUCCUUUGGAGC     | 0.5266 | 0.0046 | 0.1583 | 0.0073 | IR sensitizing     |
| hsa-miR-518d-5p  | MI0003171 | CUCUAGAGGGAAGCACUUUCUG   | 0.8675 | 0.0075 | 1.3506 | 0.2692 | —                  |
| hsa-miR-518e     | MI0003169 | AAAGCGCUUCCUUUCAGAGUG    | 0.7421 | 0.0067 | 0.7594 | 0.1167 | —                  |
| hsa-miR-518e*    | MI0003169 | CUCUAGAGGGAAGCACUUUCUG   | 0.8026 | 0.0229 | 0.9902 | 0.2155 | —                  |
| hsa-miR-518f     | MI0003154 | GAAAGCGCUUCCUUUAGAGGU    | 0.7276 | 0.0270 | 1.2259 | 0.1963 | —                  |
| hsa-miR-518f*    | MI0003154 | CUCUAGAGGGAAGCACUUUCUG   | 0.8940 | 0.0024 | 1.2722 | 0.1915 | —                  |
| hsa-miR-519a     | MI0003178 | AAAGUGCAUCCUUUAGAGUGU    | 0.8310 | 0.0043 | 0.8045 | 0.1187 | —                  |

|                 |           |                          |        |        |        |        |                    |
|-----------------|-----------|--------------------------|--------|--------|--------|--------|--------------------|
| hsa-miR-519a    | MI0003182 | AAAGUGCAUCCUUUJAGAGUGU   | 0.9624 | 0.0040 | 1.2077 | 0.1815 | —                  |
| hsa-miR-519a*   | MI0003178 | CUCUAGAGGGAAGCGCUUUCUG   | 0.7510 | 0.0092 | 0.7342 | 0.0275 | —                  |
| hsa-miR-519b    | MI0003151 | AAAGUGCAUCCUUUJAGAGGUU   | 0.9189 | 0.0113 | 0.7252 | 0.1405 | —                  |
| hsa-miR-519b-5p | MI0003151 | CUCUAGAGGGAAGCGCUUUCUG   | 0.7920 | 0.0042 | 0.9310 | 0.0826 | —                  |
| hsa-miR-519c    | MI0003148 | AAAGUGCAUCCUUUJAGAGGAU   | 0.9693 | 0.0130 | 0.5905 | 0.0473 | —                  |
| hsa-miR-519d    | MI0003162 | CAAAGUGCCUCCUUUJAGAGUGU  | 0.8220 | 0.0202 | 2.0405 | 0.3401 | IR protective      |
| hsa-miR-519e    | MI0003145 | AAGUGCCUCCUUUJAGAGUGUU   | 0.6499 | 0.0062 | 0.3304 | 0.0517 | IR sensitizing     |
| hsa-miR-519e*   | MI0003145 | UUCUCCAAAAGGGAGCACUUC    | 0.8457 | 0.0089 | 0.3640 | 0.0469 | IR sensitizing     |
| hsa-miR-520a    | MI0003149 | AAAGUGCUUCCUUUGGACUGU    | 0.8745 | 0.0012 | 0.7234 | 0.0544 | —                  |
| hsa-miR-520a*   | MI0003149 | CUCCAGAGGGAAGUACUUCU     | 0.7696 | 0.0110 | 0.4450 | 0.0159 | IR sensitizing     |
| hsa-miR-520b    | MI0003155 | AAAGUGCUUCCUUUJAGAGGG    | 0.8910 | 0.0112 | 0.8880 | 0.0533 | —                  |
| hsa-miR-520c    | MI0003158 | AAAGUGCUUCCUUUJAGAGGGU   | 0.7876 | 0.0048 | 0.9885 | 0.1667 | —                  |
| hsa-miR-520c-5p | MI0003158 | CUCUAGAGGGAAGCGCUUUCUG   | 0.8440 | 0.0019 | 1.4779 | 0.0571 | —                  |
| hsa-miR-520d    | MI0003164 | AAAGUGCUUCUUCUUGGUGGGU   | 0.9032 | 0.0444 | 1.2926 | 0.1928 | —                  |
| hsa-miR-520d*   | MI0003164 | CUACAAAGGGAAGCCUUUC      | 0.7608 | 0.0240 | 0.1496 | 0.0244 | IR sensitizing     |
| hsa-miR-520e    | MI0003143 | AAAGUGCUUCCUUUUJAGAGGG   | 0.9157 | 0.0439 | 0.6997 | 0.0412 | —                  |
| hsa-miR-520f    | MI0003146 | AAGUGCUUCCUUUJAGAGGGUU   | 0.8903 | 0.0068 | 0.6164 | 0.0233 | —                  |
| hsa-miR-520g    | MI0003166 | ACAAAGUGCUUCCUUUJAGAGUGU | 0.9687 | 0.0017 | 1.3169 | 0.0865 | —                  |
| hsa-miR-520h    | MI0003175 | ACAAAGUGCUUCCUUUJAGAGU   | 0.9646 | 0.0093 | 1.6814 | 0.0516 | —                  |
| hsa-miR-521     | MI0003163 | AACGCACUCCUUUJAGAGUGU    | 0.7223 | 0.0267 | 0.2880 | 0.0129 | IR sensitizing     |
| hsa-miR-521     | MI0003176 | AACGCACUCCUUUJAGAGUGU    | 0.7187 | 0.0149 | 0.2977 | 0.0275 | IR sensitizing     |
| hsa-miR-522     | MI0003177 | AAAAGUGUCCUUUJAGAGUGU    | 0.0629 | 0.0050 | 0.0537 | 0.0088 | Anti-proliferative |
| hsa-miR-522*    | MI0003177 | CUCUAGAGGGAAGCGCUUUCUG   | 0.7823 | 0.0121 | 0.8822 | 0.0178 | —                  |
| hsa-miR-523     | MI0003153 | GAACGCGUCCUUUJAGAGGGU    | 0.9401 | 0.0230 | 3.4475 | 0.4857 | IR protective      |
| hsa-miR-523*    | MI0003153 | CUCUAGAGGGAAGCGCUUUCUG   | 0.7568 | 0.0188 | 1.2392 | 0.0438 | —                  |
| hsa-miR-524     | MI0003160 | GAAGCGCUUCCUUUJAGAGU     | 0.8323 | 0.0173 | 0.4250 | 0.0094 | IR sensitizing     |
| hsa-miR-524*    | MI0003160 | CUACAAAGGGAAGCACUUCUC    | 0.4239 | 0.2354 | 0.0898 | 0.0023 | Anti-proliferative |
| hsa-miR-525     | MI0003152 | CUCCAGAGGGAUGCACUUCU     | 0.6866 | 0.0198 | 0.2732 | 0.0258 | IR sensitizing     |
| hsa-miR-525*    | MI0003152 | GAAGCGCUUCCUUUJAGAGCG    | 0.8352 | 0.0156 | 0.7248 | 0.1128 | —                  |
| hsa-miR-526a    | MI0003157 | CUCUAGAGGGAAGCACUUCUG    | 0.8959 | 0.0102 | 1.8187 | 0.2582 | —                  |
| hsa-miR-526a    | MI0003168 | CUCUAGAGGGAAGCACUUCUG    | 0.8567 | 0.0041 | 2.2646 | 0.3387 | IR protective      |
| hsa-miR-526b    | MI0003150 | CUCUJAGAGGGAAGCACUUCUGU  | 0.6406 | 0.0145 | 0.1201 | 0.0204 | IR sensitizing     |
| hsa-miR-526b*   | MI0003150 | GAAAGUGCUUCCUUUJAGAGGC   | 0.8523 | 0.0155 | 1.8542 | 0.2576 | —                  |
| hsa-miR-526c    | MI0003148 | CUCUAGAGGGAAGCGCUUUCUG   | 0.8395 | 0.0103 | 1.0275 | 0.1531 | —                  |
| hsa-miR-527     | MI0003179 | CUGCAAAGGGAAGCCUUUC      | 0.3343 | 0.0352 | 0.1093 | 0.0217 | Anti-proliferative |
| hsa-miR-532     | MI0003205 | CAUGCCUJAGAGUGAGGACCGU   | 0.6707 | 0.0056 | 0.0927 | 0.0076 | IR sensitizing     |
| hsa-miR-532-3p  | MI0003205 | CCUCCACACCCAAGCGUUGCA    | 0.7441 | 0.0181 | 0.7944 | 0.0212 | —                  |
| hsa-miR-539     | MI0003514 | GGAGAAUUUUCUUGGUGUGU     | 0.9824 | 0.0172 | 1.5754 | 0.2226 | —                  |
| hsa-miR-541     | MI0005539 | UGGUGGGCACAGAUCUGGACU    | 0.1194 | 0.0365 | 0.0337 | 0.0025 | Anti-proliferative |
| hsa-miR-541*    | MI0005539 | AAAGGAUUCUGCGUGCGGCCACU  | 0.8635 | 0.0169 | 0.7416 | 0.0837 | —                  |
| hsa-miR-542-3p  | MI0003686 | UGUGACAGAUUGAUUACUGAAA   | 0.7193 | 0.0082 | 0.1917 | 0.0233 | IR sensitizing     |
| hsa-miR-542-5p  | MI0003686 | UCGGGAUCAUCAUGUACAGAGA   | 0.7996 | 0.0166 | 0.7941 | 0.1062 | —                  |
| hsa-miR-543     | MI0005565 | AAACAUUCGCGGACUUCUUCU    | 0.8208 | 0.0275 | 0.7029 | 0.0050 | —                  |
| hsa-miR-544     | MI0003515 | AUUCUGCAUUUUUAGCAAGUUC   | 0.3391 | 0.0519 | 0.0860 | 0.0209 | Anti-proliferative |
| hsa-miR-545     | MI0003516 | UCAGCAAACAUUUUUGUGUGC    | 0.8838 | 0.0154 | 1.5556 | 0.0835 | —                  |
| hsa-miR-545*    | MI0003516 | UCAGUAAAUGUUUUAUJAGAUGA  | 0.8398 | 0.0070 | 1.7916 | 0.1651 | —                  |
| hsa-miR-548a    | MI0003612 | CAAAACUGGCAUUACUUUUGC    | 0.5615 | 0.0246 | 0.1504 | 0.0409 | IR sensitizing     |
| hsa-miR-548a    | MI0003598 | CAAAACUGGCAUUACUUUUGC    | 0.7331 | 0.0052 | 0.2362 | 0.0290 | IR sensitizing     |
| hsa-miR-548a    | MI0003593 | CAAAACUGGCAUUACUUUUGC    | 0.9207 | 0.0168 | 0.2621 | 0.0571 | IR sensitizing     |
| hsa-miR-548a-5p | MI0003612 | AAAAGUAAUUGCGAGUUUACC    | 0.8131 | 0.0236 | 3.0684 | 0.3806 | IR protective      |
| hsa-miR-548b    | MI0003596 | CAAGAACCUCAGUUGCUUUUGU   | 0.8633 | 0.0147 | 2.5990 | 0.2763 | IR protective      |
| hsa-miR-548b-5p | MI0003596 | AAAAGUAAUUGUGGUUUUGGCC   | 0.7502 | 0.0191 | 1.3305 | 0.2143 | —                  |
| hsa-miR-548c    | MI0003630 | CAAAAUCUCAUUACUUUUGC     | 0.7667 | 0.0076 | 1.9333 | 0.2176 | —                  |
| hsa-miR-548c-5p | MI0003630 | AAAAGUAAUUGCGUUUUUGCC    | 0.7914 | 0.0063 | 2.9747 | 0.6421 | IR protective      |
| hsa-miR-548d    | MI0003668 | CAAAAACCACAGUUCUUCUUGC   | 0.8520 | 0.0036 | 0.5751 | 0.0556 | —                  |
| hsa-miR-548d    | MI0003671 | CAAAAACCACAGUUCUUCUUGC   | 0.7955 | 0.0054 | 0.9400 | 0.0139 | —                  |
| hsa-miR-548d-5p | MI0003671 | AAAAGUAAUUGUGGUUUUUGCC   | 0.9354 | 0.0061 | 4.9504 | 0.7523 | IR protective      |
| hsa-miR-548d-5p | MI0003668 | AAAAGUAAUUGUGGUUUUUGCC   | 0.9215 | 0.0113 | 5.3036 | 0.3361 | IR protective      |
| hsa-miR-549     | MI0003679 | UGACAACUAGGAUGAGCUCU     | 0.8640 | 0.0312 | 1.2823 | 0.0319 | —                  |
| hsa-miR-550     | MI0003600 | AGUGCCUGAGGGAGUAAGAGCCC  | 0.6743 | 0.0180 | 0.6896 | 0.0635 | —                  |
| hsa-miR-550     | MI0003601 | AGUGCCUGAGGGAGUAAGAGCCC  | 0.7218 | 0.0446 | 0.8664 | 0.0597 | —                  |
| hsa-miR-550     | MI0003601 | UGUCUUACUCCUCAGGCACAU    | 0.6330 | 0.0177 | 0.3177 | 0.0879 | IR sensitizing     |
| hsa-miR-550     | MI0003600 | UGUCUUACUCCUCAGGCACAU    | 0.6664 | 0.0163 | 0.3968 | 0.0551 | IR sensitizing     |
| hsa-miR-551a    | MI0003556 | GCGACCCACUCUUGGUUUCCA    | 0.5545 | 0.3069 | 1.2156 | 0.0853 | —                  |
| hsa-miR-551b    | MI0003575 | GCGACCCAUACUUGGUUUACG    | 1.1278 | 0.0089 | 4.0334 | 0.1548 | IR protective      |
| hsa-miR-551b*   | MI0003575 | GAUAACAAGCGUGGUGAGACC    | 0.8042 | 0.0185 | 1.9005 | 0.1411 | —                  |
| hsa-miR-552     | MI0003557 | AACAGGUGACUGGUUJAGACAA   | 0.4642 | 0.0147 | 0.0714 | 0.0055 | Anti-proliferative |
| hsa-miR-553     | MI0003558 | AAAACGGUGAGAUUUUGUUUU    | 0.8194 | 0.0175 | 1.5763 | 0.0577 | —                  |

|                |           |                           |        |        |        |        |                    |
|----------------|-----------|---------------------------|--------|--------|--------|--------|--------------------|
| hsa-miR-554    | MI0003559 | GCUAGUCCUGACUCAGCCAGU     | 0.9186 | 0.0031 | 1.2594 | 0.0934 | —                  |
| hsa-miR-555    | MI0003561 | AGGGUAAAGCUGAACCCUCUGAU   | 0.1162 | 0.0134 | 0.0879 | 0.0076 | Anti-proliferative |
| hsa-miR-556    | MI0003562 | GAUGAGCUCAUUGUAAUAUGAG    | 0.8197 | 0.0145 | 1.7974 | 0.3142 | —                  |
| hsa-miR-556-3p | MI0003562 | AUAUUACCAUUAGCUAUCUUUU    | 0.7398 | 0.0212 | 0.3305 | 0.0264 | IR sensitizing     |
| hsa-miR-557    | MI0003563 | GUUUGCACGGGUGGGCCUUGUCU   | 0.7399 | 0.0086 | 0.4110 | 0.0303 | IR sensitizing     |
| hsa-miR-558    | MI0003564 | UGAGCUGCUGUACCAAAA        | 0.6841 | 0.0507 | 0.1866 | 0.0166 | IR sensitizing     |
| hsa-miR-559    | MI0003565 | UAAAGUAAAUAUGCACCAAAA     | 0.9235 | 0.0211 | 1.9453 | 0.2155 | —                  |
| hsa-miR-561    | MI0003567 | CAAAGUUUAAGAUCUUGAAGU     | 0.8133 | 0.0008 | 0.2874 | 0.1278 | IR sensitizing     |
| hsa-miR-562    | MI0003568 | AAAGUAGCUGUACCAUUUGC      | 0.6971 | 0.0215 | 0.1619 | 0.0192 | IR sensitizing     |
| hsa-miR-563    | MI0003569 | AGGUUGACAUCGUUUUCCC       | 0.3863 | 0.2158 | 0.0908 | 0.0027 | Anti-proliferative |
| hsa-miR-564    | MI0003570 | AGGCACGGUGUCAGCAGGC       | 0.8192 | 0.0116 | 0.2706 | 0.0227 | IR sensitizing     |
| hsa-miR-566    | MI0003572 | GGGCGCCUGUGAUCCCAAC       | 1.0821 | 0.0056 | 2.8244 | 0.2211 | IR protective      |
| hsa-miR-567    | MI0003573 | AGUAUGUUCUCCAGCAGAGAAC    | 0.8262 | 0.0014 | 0.3297 | 0.0680 | IR sensitizing     |
| hsa-miR-568    | MI0003574 | AUGUAUAAAUGUAUACACAC      | 0.9697 | 0.0101 | 3.1237 | 0.2010 | IR protective      |
| hsa-miR-569    | MI0003576 | AGUUAUGAAUCCUGGAAAGU      | 1.0259 | 0.0196 | 1.8841 | 0.3260 | —                  |
| hsa-miR-570    | MI0003577 | CGAAAACAGCAUUACCUUUGC     | 0.8139 | 0.0214 | 0.3634 | 0.0646 | IR sensitizing     |
| hsa-miR-571    | MI0003578 | UGAGUUGGCCAUCUGAGUGAG     | 0.5747 | 0.0629 | 0.1215 | 0.0034 | IR sensitizing     |
| hsa-miR-572    | MI0003579 | GUCCGCUCGGCGGUGGCCCA      | 0.9886 | 0.0078 | 1.9423 | 0.1689 | —                  |
| hsa-miR-573    | MI0003580 | CUGAAGUGAUGUUAACUGAUCAG   | 0.9939 | 0.0322 | 0.7947 | 0.0439 | —                  |
| hsa-miR-574    | MI0003581 | CAGCUCUAUGCACACCCACA      | 0.8017 | 0.0360 | 0.6905 | 0.1058 | —                  |
| hsa-miR-574-5p | MI0003581 | UGAGUGUGUGUGUGAGUGUGU     | 0.6811 | 0.0222 | 0.4920 | 0.0911 | IR sensitizing     |
| hsa-miR-575    | MI0003582 | GAGCCAGUUGGACAGGAGC       | 0.6206 | 0.3550 | 0.6197 | 0.0790 | —                  |
| hsa-miR-576    | MI0003583 | AUUCUAAUUUCUCCACGUCUUU    | 0.7617 | 0.0037 | 1.4493 | 0.2346 | —                  |
| hsa-miR-576-3p | MI0003583 | AAGAUGUGGAAAAUUGGAAUC     | 0.2807 | 0.0166 | 0.1449 | 0.0236 | Anti-proliferative |
| hsa-miR-577    | MI0003584 | UAGAUA AAAUUGGUACUUC      | 1.0014 | 0.0250 | 4.8169 | 0.7454 | IR protective      |
| hsa-miR-578    | MI0003585 | CUUCUUGUCUCUAGGAUUGU      | 0.8284 | 0.0423 | 0.0951 | 0.0195 | IR sensitizing     |
| hsa-miR-579    | MI0003586 | UUCAUUUGGUUAAAACCGCAUU    | 0.7297 | 0.0094 | 0.1653 | 0.0401 | IR sensitizing     |
| hsa-miR-580    | MI0003587 | UUGAGAAUGAUGAAUCAUUGAG    | 0.8543 | 0.0113 | 1.0707 | 0.1375 | —                  |
| hsa-miR-581    | MI0003588 | UCUUGUGUUCUCUAGAUACAGU    | 0.8913 | 0.0332 | 1.2881 | 0.3055 | —                  |
| hsa-miR-582    | MI0003589 | UUACAGUUGUUAACCCAGUUACU   | 0.8277 | 0.0316 | 1.1894 | 0.1452 | —                  |
| hsa-miR-582-3p | MI0003589 | UACUGGUUGAACAACAGUAACC    | 0.6629 | 0.0258 | 0.2721 | 0.0631 | IR sensitizing     |
| hsa-miR-583    | MI0003590 | CAAAGAGGAAGGUCCAUUAC      | 0.8020 | 0.0215 | 0.3255 | 0.0267 | IR sensitizing     |
| hsa-miR-584    | MI0003591 | UUAUGGUUUUGCCUGGGACUGAG   | 0.9960 | 0.0202 | 0.6305 | 0.1587 | —                  |
| hsa-miR-585    | MI0003592 | UGGCGUAUCUGUAUGCUA        | 0.6730 | 0.0421 | 0.0649 | 0.0256 | IR sensitizing     |
| hsa-miR-586    | MI0003594 | UAUGCAUUGUAUUUUUAGGUCC    | 0.8685 | 0.0187 | 1.2299 | 0.1391 | —                  |
| hsa-miR-587    | MI0003595 | UUUCCAUGGUGAUGAGUCAC      | 0.8276 | 0.0284 | 2.6334 | 0.1851 | IR protective      |
| hsa-miR-588    | MI0003597 | UUGGCCACAUGGGUUAAGAAC     | 0.5124 | 0.0164 | 0.2784 | 0.0566 | IR sensitizing     |
| hsa-miR-589    | MI0003599 | UGAGAACCACGUCUCUCUGAG     | 0.6504 | 0.0510 | 0.4088 | 0.0425 | IR sensitizing     |
| hsa-miR-589*   | MI0003599 | UCAGAACA AAUGCCGUUCCAGAG  | 0.9437 | 0.0105 | 1.2291 | 0.1367 | —                  |
| hsa-miR-590    | MI0003602 | GAGCUUUAUCAUAAAAGUGCAG    | 0.7327 | 0.0198 | 1.0797 | 0.0457 | —                  |
| hsa-miR-590-3p | MI0003602 | UAAUUUUUAUGUAUAAGCUAGU    | 0.7241 | 0.0287 | 0.8250 | 0.0788 | —                  |
| hsa-miR-591    | MI0003603 | AGACCAUGGGUUCUCAUUGU      | 0.6342 | 0.0056 | 0.3093 | 0.0671 | IR sensitizing     |
| hsa-miR-592    | MI0003604 | UUGUGUCAAUAGCCGAUGAUGU    | 0.8591 | 0.0113 | 0.9833 | 0.2716 | —                  |
| hsa-miR-593    | MI0003605 | UGUCUCUGCUGGGUUUCU        | 0.5897 | 0.0218 | 0.1131 | 0.0270 | IR sensitizing     |
| hsa-miR-593*   | MI0003605 | AGGCACCAGCCAGGCAUUGCUCAGC | 0.6574 | 0.0165 | 0.2943 | 0.0542 | IR sensitizing     |
| hsa-miR-595    | MI0003607 | GAAGUGUGCCGUGGUGUGUCU     | 0.8089 | 0.0082 | 0.4947 | 0.0571 | IR sensitizing     |
| hsa-miR-596    | MI0003608 | AAGCCUGCCGGCUCUCCGGG      | 0.6315 | 0.0156 | 0.2701 | 0.0936 | IR sensitizing     |
| hsa-miR-597    | MI0003609 | UGUGUCACUCGAUACCACUGU     | 0.6543 | 0.0206 | 1.2019 | 0.1515 | —                  |
| hsa-miR-598    | MI0003610 | UACGUCAUCGUUGCAUCGUA      | 0.8818 | 0.0156 | 2.0214 | 0.4670 | IR protective      |
| hsa-miR-599    | MI0003611 | GUUGUGUCAGUUUAUCAAAC      | 0.8236 | 0.0071 | 0.8765 | 0.0618 | —                  |
| hsa-miR-600    | MI0003613 | ACUUACAGACAAGACCCUUGCUC   | 0.7186 | 0.0455 | 0.2020 | 0.0357 | IR sensitizing     |
| hsa-miR-601    | MI0003614 | UGGUCUAGGAUUGUUGGAGGAG    | 0.6073 | 0.0075 | 0.2373 | 0.0500 | IR sensitizing     |
| hsa-miR-602    | MI0003615 | GACACGGGGCAGACGUCGGGCC    | 0.7976 | 0.0082 | 1.2706 | 0.0643 | —                  |
| hsa-miR-603    | MI0003616 | CACACACUGCAAUUACUUUUGC    | 0.6861 | 0.0068 | 0.3129 | 0.0287 | IR sensitizing     |
| hsa-miR-604    | MI0003617 | AGGCUGCCGAAUUCAGGAC       | 0.1753 | 0.0127 | 0.1343 | 0.0359 | Anti-proliferative |
| hsa-miR-605    | MI0003618 | UAAAUCCAUUGGUGCCUUCUCCU   | 0.7534 | 0.0176 | 0.3836 | 0.0676 | IR sensitizing     |
| hsa-miR-606    | MI0003619 | AAACUACUGAAAUAUCAAAGAU    | 0.7274 | 0.0068 | 1.0708 | 0.2286 | —                  |
| hsa-miR-607    | MI0003620 | GUUCAAAUCCAGAUCUAUAAAC    | 0.7585 | 0.0071 | 0.5614 | 0.0617 | —                  |
| hsa-miR-608    | MI0003621 | AGGGGUGGUGUUGGACAGCUCCGU  | 0.2620 | 0.0099 | 0.0577 | 0.0085 | Anti-proliferative |
| hsa-miR-609    | MI0003622 | AGGGUUUUCUCUCAUCUCU       | 0.5675 | 0.0068 | 0.1130 | 0.0267 | IR sensitizing     |
| hsa-miR-610    | MI0003623 | UGAGCUAAAUGUGUGUGGGA      | 0.9146 | 0.0125 | 1.3326 | 0.0994 | —                  |
| hsa-miR-611    | MI0003624 | GCGAGGACCCUCGGGUCUGAC     | 0.8113 | 0.0244 | 3.1278 | 0.4857 | IR protective      |
| hsa-miR-612    | MI0003625 | GCUGGGCAGGGUUCUGAGCUCUU   | 0.7708 | 0.0091 | 0.2953 | 0.0192 | IR sensitizing     |
| hsa-miR-613    | MI0003626 | AGGAAUGUUCCUUCUUUGCC      | 0.4087 | 0.0740 | 0.1433 | 0.0242 | Anti-proliferative |
| hsa-miR-614    | MI0003627 | GAACGCCUGUUCUUGCCAGGUGG   | 0.6889 | 0.0176 | 0.8320 | 0.0181 | —                  |
| hsa-miR-615    | MI0003628 | UCCGAGCCUGGGUUCUCCUUCU    | 0.7846 | 0.0025 | 1.2496 | 0.1866 | —                  |
| hsa-miR-615-5p | MI0003628 | GGGGUCCCGGUCUCGGAUC       | 0.7826 | 0.0126 | 3.2537 | 0.5938 | IR protective      |
| hsa-miR-616    | MI0003629 | AGUCAUUGGAGGGUUUGAGCAG    | 0.7105 | 0.0154 | 0.8165 | 0.0632 | —                  |

|                |           |                          |        |        |        |        |                    |
|----------------|-----------|--------------------------|--------|--------|--------|--------|--------------------|
| hsa-miR-616*   | MI0003629 | ACUCAAAACCCUUCAGUGACUU   | 0.7941 | 0.0126 | 1.9116 | 0.1611 | —                  |
| hsa-miR-617    | MI0003631 | AGACUUCCAUUUGAAGGUGGC    | 0.6074 | 0.0163 | 0.1731 | 0.0135 | IR sensitizing     |
| hsa-miR-618    | MI0003632 | AAACUCUACUUGUCUUCUGAGU   | 0.6362 | 0.0250 | 0.4019 | 0.1124 | IR sensitizing     |
| hsa-miR-619    | MI0003633 | GACCUGGACAUGUUUGUCCAGU   | 0.6414 | 0.0214 | 0.3375 | 0.0715 | IR sensitizing     |
| hsa-miR-620    | MI0003634 | AUGGAGAUAGAUUAGAAAU      | 0.7084 | 0.0167 | 0.5397 | 0.0243 | —                  |
| hsa-miR-621    | MI0003635 | GGCUAGCAACAGCGCUUACCU    | 0.7510 | 0.0155 | 0.2068 | 0.0320 | IR sensitizing     |
| hsa-miR-622    | MI0003636 | ACAGUCUGCUGAGGUUGGAGC    | 0.9046 | 0.0134 | 2.7038 | 0.6465 | IR protective      |
| hsa-miR-623    | MI0003637 | AUCCCUUGCAGGGGUCGUUGGGU  | 0.8219 | 0.0397 | 2.2062 | 0.0574 | IR protective      |
| hsa-miR-624    | MI0003638 | CACAAGGUUUUGUUAUACCU     | 0.6239 | 0.0114 | 0.4461 | 0.0622 | IR sensitizing     |
| hsa-miR-624*   | MI0003638 | UAGUACCAGUACCUUGUGUUCA   | 0.9655 | 0.0188 | 0.2953 | 0.0430 | IR sensitizing     |
| hsa-miR-625    | MI0003639 | AGGGGAAAGUUCUUAUAGUCC    | 0.2739 | 0.0345 | 0.1033 | 0.0304 | Anti-proliferative |
| hsa-miR-625*   | MI0003639 | GACUUAAGAACUUUCCCCUCA    | 0.7116 | 0.0143 | 0.2208 | 0.0136 | IR sensitizing     |
| hsa-miR-626    | MI0003640 | AGCUGUCGAAAAGUUCUU       | 0.8906 | 0.0107 | 1.8490 | 0.0199 | —                  |
| hsa-miR-627    | MI0003641 | GUGAGUCUCUAAAGAAAGAGGA   | 0.8221 | 0.0418 | 1.6907 | 0.1858 | —                  |
| hsa-miR-628    | MI0003642 | UCUAGUAAGAGUGGCAGUCGA    | 0.6996 | 0.0051 | 0.9057 | 0.1626 | —                  |
| hsa-miR-628-5p | MI0003642 | AUGCUGACAUAUUUACUAGAGG   | 0.7459 | 0.0345 | 0.1549 | 0.0100 | IR sensitizing     |
| hsa-miR-629    | MI0003643 | UGGGUUUACGUUGGGAGAACU    | 0.5570 | 0.0196 | 0.2582 | 0.0310 | IR sensitizing     |
| hsa-miR-629*   | MI0003643 | GUUCUCCCAACGUUAGCCAGC    | 0.6863 | 0.0072 | 0.0951 | 0.0062 | IR sensitizing     |
| hsa-miR-630    | MI0003644 | AGUAUUCUGUACCGAGGUAAGU   | 0.7773 | 0.0159 | 0.2863 | 0.0662 | IR sensitizing     |
| hsa-miR-631    | MI0003645 | AGCCUGGCCAGACGUACAGC     | 0.1615 | 0.0060 | 0.0613 | 0.0077 | Anti-proliferative |
| hsa-miR-632    | MI0003647 | GUGUCUGCUUCCUGUGGGA      | 0.9399 | 0.0300 | 1.2700 | 0.1292 | —                  |
| hsa-miR-633    | MI0003648 | CUAAUAGUAUCUACCACAAUAAA  | 0.8992 | 0.0149 | 0.7176 | 0.0351 | —                  |
| hsa-miR-634    | MI0003649 | AACCAGCACCCAAUUCUGAC     | 0.6078 | 0.0142 | 0.1465 | 0.0325 | IR sensitizing     |
| hsa-miR-635    | MI0003650 | ACUUGGGCACUGAAACAAGUCC   | 0.8528 | 0.0108 | 0.2309 | 0.0293 | IR sensitizing     |
| hsa-miR-636    | MI0003651 | UGUCUUGCUCGUCACCGCCGCA   | 0.7225 | 0.0062 | 1.7883 | 0.3065 | —                  |
| hsa-miR-637    | MI0003652 | ACUGGGGGCUUUCGGGCUUGCGU  | 0.2753 | 0.0997 | 0.0879 | 0.0162 | Anti-proliferative |
| hsa-miR-638    | MI0003653 | AGGGAUCGCGGGGCGGUGGCGCCU | 0.8444 | 0.0269 | 2.1147 | 0.0481 | IR protective      |
| hsa-miR-639    | MI0003654 | AUCGCGCGGUUGCGAGCGCUGU   | 0.6498 | 0.0083 | 1.5079 | 0.0576 | —                  |
| hsa-miR-640    | MI0003655 | AUGAUCCAGGAACCUGCCUCU    | 0.6463 | 0.0554 | 0.3225 | 0.0444 | IR sensitizing     |
| hsa-miR-641    | MI0003656 | AAAGACAUGGAUAGAGUCACCUC  | 0.9653 | 0.0093 | 2.2577 | 0.0540 | IR protective      |
| hsa-miR-642    | MI0003657 | GUCCUCUCCAAUAGUUCUUG     | 0.9330 | 0.0099 | 2.2167 | 0.0338 | IR protective      |
| hsa-miR-643    | MI0003658 | ACUUGUAUGCUAGCUCAGGUAG   | 0.8890 | 0.0140 | 1.9603 | 0.0840 | —                  |
| hsa-miR-644    | MI0003659 | AGUGUGGCUUUCUUAAGAGC     | 0.0608 | 0.0090 | 0.0480 | 0.0083 | Anti-proliferative |
| hsa-miR-645    | MI0003660 | UCUAGGCUGGUACUGCUGA      | 0.6605 | 0.0112 | 0.5028 | 0.0292 | —                  |
| hsa-miR-646    | MI0003661 | AAGCAGCUGCCUCUGAGGC      | 0.1223 | 0.0295 | 0.0642 | 0.0030 | Anti-proliferative |
| hsa-miR-647    | MI0003662 | GUGGCUGCACUCACUUCUUC     | 0.0688 | 0.0023 | 0.0996 | 0.0107 | Anti-proliferative |
| hsa-miR-648    | MI0003663 | AAGUGUGCAGGGCACUGGU      | 0.7487 | 0.0033 | 0.1664 | 0.0020 | IR sensitizing     |
| hsa-miR-649    | MI0003664 | AAACCUGUGUUGUUAAGAGUC    | 0.7175 | 0.0030 | 1.1632 | 0.0345 | —                  |
| hsa-miR-650    | MI0003665 | AGGAGGCAGCGCUCUAGGAC     | 0.2105 | 0.0215 | 0.1011 | 0.0059 | Anti-proliferative |
| hsa-miR-651    | MI0003666 | UUUAGGAUAAGCUUGACUUUUG   | 0.7502 | 0.0072 | 0.9620 | 0.0514 | —                  |
| hsa-miR-652    | MI0003667 | AAUGGCGCCACUAGGGUUGUG    | 0.7709 | 0.0078 | 0.6366 | 0.1118 | —                  |
| hsa-miR-653    | MI0003674 | GUGUUGAAACAUCUACUCUG     | 0.7949 | 0.0019 | 1.4973 | 0.2517 | —                  |
| hsa-miR-654    | MI0003676 | UGUUGGGCCGAGAACAUGUGC    | 0.1101 | 0.0041 | 0.0489 | 0.0030 | Anti-proliferative |
| hsa-miR-654-3p | MI0003676 | UAUGUCUGCUGACCAUCACCUU   | 0.8659 | 0.0122 | 1.2998 | 0.1577 | —                  |
| hsa-miR-655    | MI0003677 | AUAUAACAUGGUUAACCUCUUU   | 0.2905 | 0.0420 | 0.0589 | 0.0022 | Anti-proliferative |
| hsa-miR-656    | MI0003678 | AAUAUUUAACAGUCAACCCUCU   | 0.6830 | 0.0023 | 0.2882 | 0.0292 | IR sensitizing     |
| hsa-miR-657    | MI0003681 | GGCAGGUUCACCCUCUCUAGG    | 0.4618 | 0.0162 | 0.1648 | 0.0010 | Anti-proliferative |
| hsa-miR-658    | MI0003682 | GGCGGAGGGAAGUAGGUCCUUGU  | 0.8937 | 0.0230 | 1.8790 | 0.1013 | —                  |
| hsa-miR-659    | MI0003683 | CUUGGUUCAGGGAGGUCCCCA    | 0.6451 | 0.0122 | 0.6915 | 0.0781 | —                  |
| hsa-miR-660    | MI0003684 | UACCCAUUGCAUAUCGGAGUUG   | 0.8994 | 0.0159 | 0.2500 | 0.0016 | IR sensitizing     |
| hsa-miR-661    | MI0003669 | UGCCUGGGUCUCUGGCCUGCGCU  | 0.5180 | 0.0122 | 0.1486 | 0.0055 | IR sensitizing     |
| hsa-miR-662    | MI0003670 | UCCACGUUGUGGCCAGCAG      | 0.8326 | 0.0290 | 1.6693 | 0.0469 | —                  |
| hsa-miR-663    | MI0003672 | AGGCGGGGCGCCGCGGACCCG    | 0.6184 | 0.0008 | 0.2509 | 0.0108 | IR sensitizing     |
| hsa-miR-665    | MI0005563 | ACCAGGAGCUGAGGCCCUU      | 0.2821 | 0.0050 | 0.1051 | 0.0027 | Anti-proliferative |
| hsa-miR-668    | MI0003761 | UGUCACUCGGCUCGGCCACUAC   | 0.8461 | 0.0164 | 0.7148 | 0.0135 | —                  |
| hsa-miR-671    | MI0003760 | AGGAAGCCUCUGAGGGCUGGAG   | 0.7896 | 0.0102 | 0.4862 | 0.0196 | IR sensitizing     |
| hsa-miR-671-3p | MI0003760 | UCCGGUUCUCAGGGCUCACC     | 0.1364 | 0.0115 | 0.0474 | 0.0021 | Anti-proliferative |
| hsa-miR-675    | MI0005416 | UGGUGCGGAGAGGGCCACAGUG   | 0.6181 | 0.0192 | 0.5753 | 0.1506 | —                  |
| hsa-miR-7      | MI0000264 | UGGAAGACUAGUGAUUUUGUUGU  | 0.1714 | 0.0120 | 0.0911 | 0.0155 | Anti-proliferative |
| hsa-miR-7      | MI0000265 | UGGAAGACUAGUGAUUUUGUUGU  | 0.2570 | 0.0275 | 0.0978 | 0.0075 | Anti-proliferative |
| hsa-miR-7      | MI0000263 | UGGAAGACUAGUGAUUUUGUUGU  | 0.2629 | 0.0385 | 0.1305 | 0.0262 | Anti-proliferative |
| hsa-miR-708    | MI0005543 | AAGGAGCUUACAUCUAGCUGGG   | 0.3871 | 0.0055 | 0.0467 | 0.0063 | Anti-proliferative |
| hsa-miR-708*   | MI0005543 | CAACUAGACUGUGAGCUUCUAG   | 0.9674 | 0.0174 | 0.1646 | 0.0068 | IR sensitizing     |
| hsa-miR-7-1*   | MI0000263 | CAACAAUACAGUCUGCCAAU     | 0.9904 | 0.0335 | 1.6279 | 0.0521 | —                  |
| hsa-miR-7-2*   | MI0000264 | CAACAAUCCAGUCUACCUAA     | 0.8262 | 0.0202 | 2.3763 | 0.4132 | IR protective      |
| hsa-miR-744    | MI0005559 | UGCGGGCUAGGGCUAACAGCA    | 0.1974 | 0.0020 | 0.0251 | 0.0023 | Anti-proliferative |
| hsa-miR-744*   | MI0005559 | CUGUUGCCACUAACCUAACCU    | 0.5920 | 0.0078 | 0.0592 | 0.0072 | IR sensitizing     |
| hsa-miR-758    | MI0003757 | UUUGUGACCUUGUCCACUAACC   | 0.7816 | 0.0149 | 0.1768 | 0.0055 | IR sensitizing     |

|                |           |                             |        |        |        |        |                    |
|----------------|-----------|-----------------------------|--------|--------|--------|--------|--------------------|
| hsa-miR-760    | MI0005567 | CGGCUCUGGGUCUGUGGGGA        | 0.8509 | 0.0185 | 0.6354 | 0.0999 | —                  |
| hsa-miR-765    | MI0005116 | UGGAGGAGAAGGAAGUGAUG        | 0.0857 | 0.0068 | 0.0722 | 0.0142 | Anti-proliferative |
| hsa-miR-766    | MI0003836 | ACUCCAGCCCCACAGCCUCAGC      | 0.5861 | 0.0154 | 0.1659 | 0.0319 | IR sensitizing     |
| hsa-miR-767-3p | MI0003763 | UCUGCUCUAACCCCAUGGUUUUCU    | 0.8636 | 0.0212 | 0.1810 | 0.0051 | IR sensitizing     |
| hsa-miR-767-5p | MI0003763 | UGCACCAUGGUUGUCUGAGCAUG     | 0.8936 | 0.0262 | 0.2445 | 0.0181 | IR sensitizing     |
| hsa-miR-768-3p | MI0005117 | UCACAAUGCUGACACUCAAACUCUGAC | 0.8040 | 0.0089 | 0.1908 | 0.0216 | IR sensitizing     |
| hsa-miR-768-5p | MI0005117 | GUUGGAGGAUGAAAGUACGGAGUGAU  | 0.2207 | 0.0405 | 0.0926 | 0.0081 | Anti-proliferative |
| hsa-miR-769-3p | MI0003834 | CUGGGAUCUCGGGGUCUUGGUU      | 0.8738 | 0.0325 | 0.3271 | 0.0594 | IR sensitizing     |
| hsa-miR-769-5p | MI0003834 | UGAGACCUCUGGUUCUGAGCU       | 0.6996 | 0.0082 | 0.2732 | 0.0441 | IR sensitizing     |
| hsa-miR-770-5p | MI0005118 | UCCAGUACCACGUGUCAGGGCCA     | 0.7515 | 0.0363 | 0.1724 | 0.0130 | IR sensitizing     |
| hsa-miR-801    | MI0005202 | GAUUGCUCUGCGUGCGGAAUCGAC    | 0.7025 | 0.0048 | 0.1065 | 0.0138 | IR sensitizing     |
| hsa-miR-802    | MI0003906 | CAGUAACAAGAUUACUCCUUGU      | 0.7886 | 0.0276 | 0.3697 | 0.0506 | IR sensitizing     |
| hsa-miR-873    | MI0005564 | GCAGAACUUGUGAGUCUCCU        | 0.6987 | 0.0062 | 0.2942 | 0.0211 | IR sensitizing     |
| hsa-miR-874    | MI0005532 | CUGCCUUGGCCGAGGGACCGA       | 1.0246 | 0.0387 | 2.6905 | 0.0877 | IR protective      |
| hsa-miR-875-3p | MI0005541 | CCUGGAAACACUGAGGUUGUG       | 0.8499 | 0.0092 | 1.5871 | 0.0540 | —                  |
| hsa-miR-875-5p | MI0005541 | UAUACCUCAGUUUUUACAGGUG      | 0.7868 | 0.0206 | 0.6278 | 0.0628 | —                  |
| hsa-miR-876-3p | MI0005542 | UGGUGGUUUACAAAGUAAUUCA      | 0.2734 | 0.0087 | 0.0578 | 0.0043 | Anti-proliferative |
| hsa-miR-876-5p | MI0005542 | UGGAUUUCUUGUGAAUCACCA       | 0.7955 | 0.0084 | 0.6314 | 0.0123 | —                  |
| hsa-miR-877    | MI0005561 | GUAGAGGAGAUGCCGACGGG        | 0.9912 | 0.0158 | 1.9139 | 0.0225 | —                  |
| hsa-miR-877*   | MI0005561 | UCCUCUUCUCCUCCUCCGAG        | 0.8140 | 0.0146 | 0.4357 | 0.0581 | IR sensitizing     |
| hsa-miR-885-3p | MI0005560 | AGGCAGCGGGGUGUAGUGGAUA      | 0.2602 | 0.0445 | 0.0882 | 0.0098 | Anti-proliferative |
| hsa-miR-885-5p | MI0005560 | UCCAUAACACUACCCUGCCUCU      | 0.6969 | 0.0265 | 0.1925 | 0.0095 | IR sensitizing     |
| hsa-miR-886-3p | MI0005527 | CGCGGGUGCUUACUGACCCUU       | 0.4644 | 0.0676 | 0.0382 | 0.0058 | Anti-proliferative |
| hsa-miR-886-5p | MI0005527 | CGGGUCGGAGUUAGCUCAAGCGG     | 0.7484 | 0.0032 | 2.3542 | 0.2416 | IR protective      |
| hsa-miR-887    | MI0005562 | GUGAACGGGCGCCAGCCGAGG       | 0.7336 | 0.0269 | 0.3010 | 0.0417 | IR sensitizing     |
| hsa-miR-888    | MI0005537 | UACUCAAAAAGCUGUCAGUCA       | 1.0749 | 0.0147 | 2.6597 | 0.0495 | IR protective      |
| hsa-miR-888*   | MI0005537 | GACUGACACCUCUUGGGUGAA       | 0.9271 | 0.0135 | 0.1030 | 0.0091 | IR sensitizing     |
| hsa-miR-889    | MI0005540 | UUAUAUCGGACAACCAUUGU        | 0.6494 | 0.0133 | 0.1319 | 0.0088 | IR sensitizing     |
| hsa-miR-890    | MI0005533 | UACUUGGAAAGGCAUCAGUUG       | 0.8707 | 0.0390 | 0.0533 | 0.0057 | IR sensitizing     |
| hsa-miR-891a   | MI0005524 | UGCAACGAACCCUGAGCCACUGA     | 0.7373 | 0.0084 | 0.5143 | 0.1170 | —                  |
| hsa-miR-891b   | MI0005534 | UGCAACUUAACCCUGAGCAUUGA     | 0.2264 | 0.0268 | 0.0583 | 0.0051 | Anti-proliferative |
| hsa-miR-892a   | MI0005528 | CACUGUGUCUUUCUGCGUAG        | 0.6746 | 0.0066 | 0.1790 | 0.0126 | IR sensitizing     |
| hsa-miR-892b   | MI0005538 | CACUGGCUCUUUCUGGGUAGA       | 0.8056 | 0.0304 | 0.1421 | 0.0140 | IR sensitizing     |
| hsa-miR-9      | MI0000467 | UCUUUGGUUAUCUAGCUGUAUGA     | 0.5891 | 0.0321 | 0.0715 | 0.0059 | IR sensitizing     |
| hsa-miR-9      | MI0000466 | UCUUUGGUUAUCUAGCUGUAUGA     | 0.6023 | 0.0130 | 0.2033 | 0.0356 | IR sensitizing     |
| hsa-miR-9      | MI0000468 | UCUUUGGUUAUCUAGCUGUAUGA     | 0.6973 | 0.0338 | 0.2387 | 0.0371 | IR sensitizing     |
| hsa-miR-9*     | MI0000466 | AUAAAGCUAGAUAAACCGAAAGU     | 0.6705 | 0.0431 | 0.0735 | 0.0094 | IR sensitizing     |
| hsa-miR-9*     | MI0000467 | AUAAAGCUAGAUAAACCGAAAGU     | 0.4757 | 0.0058 | 0.0357 | 0.0084 | Anti-proliferative |
| hsa-miR-9*     | MI0000468 | AUAAAGCUAGAUAAACCGAAAGU     | 0.4899 | 0.0497 | 0.0455 | 0.0017 | Anti-proliferative |
| hsa-miR-92     | MI0000093 | UAUUGCACUUGUCCGGCCUGU       | 0.7725 | 0.0135 | 1.0849 | 0.1993 | —                  |
| hsa-miR-92     | MI0000094 | UAUUGCACUUGUCCGGCCUGU       | 0.6688 | 0.0046 | 2.0861 | 0.2660 | IR protective      |
| hsa-miR-920    | MI0005712 | GGGAGCUGUGGAAGCAGUA         | 0.8542 | 0.0030 | 0.9291 | 0.0372 | —                  |
| hsa-miR-921    | MI0005713 | CUAGUGAGGACAGAACAGGAUUC     | 0.7283 | 0.0074 | 0.2628 | 0.0113 | IR sensitizing     |
| hsa-miR-922    | MI0005714 | GCAGCAGAGAAUAGGACUACGUC     | 0.6947 | 0.0064 | 0.3676 | 0.0405 | IR sensitizing     |
| hsa-miR-923    | MI0005715 | GUCAGCGGAGGAAAAGAAACU       | 0.8434 | 0.0046 | 1.3210 | 0.0718 | —                  |
| hsa-miR-924    | MI0005716 | AGAGUCUUGUGAUGUCUUGC        | 0.6991 | 0.0101 | 0.2422 | 0.0118 | IR sensitizing     |
| hsa-miR-92a-1* | MI0000093 | AGGUUGGGAUCGGUUGCAUUGCU     | 0.2934 | 0.0522 | 0.0998 | 0.0209 | Anti-proliferative |
| hsa-miR-92a-2* | MI0000094 | GGGUGGGGAUUUGUUGCAUUC       | 0.8557 | 0.0415 | 0.2502 | 0.0235 | IR sensitizing     |
| hsa-miR-92b    | MI0003560 | UAUUGCACUUGUCCGGCCUCC       | 0.6330 | 0.0051 | 1.6427 | 0.2615 | —                  |
| hsa-miR-92b*   | MI0003560 | AGGACGGGACGCGGUGCAGUG       | 0.5920 | 0.0166 | 0.5061 | 0.0583 | —                  |
| hsa-miR-93     | MI0000095 | CAAAGUCUGUUCGUGCAGGUAG      | 0.8551 | 0.0077 | 1.0794 | 0.0701 | —                  |
| hsa-miR-93*    | MI0000095 | ACUGCUGAGCUAGCACUUCGCG      | 0.5672 | 0.0067 | 0.0845 | 0.0062 | IR sensitizing     |
| hsa-miR-933    | MI0005755 | UGUGCGCAGGAGACCUCUCC        | 0.7827 | 0.0042 | 0.5547 | 0.0200 | —                  |
| hsa-miR-934    | MI0005756 | UGUCUACUACUGGAGACUUGG       | 0.3986 | 0.0491 | 0.1013 | 0.0094 | Anti-proliferative |
| hsa-miR-935    | MI0005757 | CCAGUUACCGCUUCGCUACCGC      | 0.7700 | 0.0054 | 0.8101 | 0.1698 | —                  |
| hsa-miR-936    | MI0005758 | ACAGUAGAGGGAGGAAUCGCAG      | 0.7824 | 0.0160 | 0.4115 | 0.0577 | IR sensitizing     |
| hsa-miR-937    | MI0005759 | AUCCGCGCUCUGACUCUCUGCC      | 0.6994 | 0.0103 | 0.5768 | 0.0114 | —                  |
| hsa-miR-938    | MI0005760 | UGCCCUAAAGGUGAACCCAGU       | 0.7252 | 0.0085 | 0.8297 | 0.0190 | —                  |
| hsa-miR-939    | MI0005761 | UGGGGAGCUGAGGCUCUGGGGUG     | 0.8513 | 0.0178 | 0.9736 | 0.1125 | —                  |
| hsa-miR-940    | MI0005762 | AAGGCAGGGCCCCGCUCCCC        | 0.1697 | 0.0039 | 0.0642 | 0.0036 | Anti-proliferative |
| hsa-miR-941    | MI0005766 | CACCCGGCUGUGGACACAUGUGC     | 0.7536 | 0.0063 | 0.8579 | 0.0633 | —                  |
| hsa-miR-941    | MI0005764 | CACCCGGCUGUGGACACAUGUGC     | 0.7746 | 0.0053 | 0.8826 | 0.0352 | —                  |
| hsa-miR-941    | MI0005765 | CACCCGGCUGUGGACACAUGUGC     | 0.7438 | 0.0036 | 0.9375 | 0.0317 | —                  |
| hsa-miR-941    | MI0005763 | CACCCGGCUGUGGACACAUGUGC     | 0.7499 | 0.0133 | 1.0242 | 0.0256 | —                  |
| hsa-miR-942    | MI0005767 | UCUUCUCUGUUUGGCCAUGUG       | 0.8396 | 0.0154 | 0.3676 | 0.0681 | IR sensitizing     |
| hsa-miR-943    | MI0005768 | CUGACUGUUGCCGUCUCCAG        | 0.5568 | 0.0045 | 0.1424 | 0.0055 | IR sensitizing     |
| hsa-miR-944    | MI0005769 | AAAUUAUUGUACAUCCGAUGAG      | 0.5740 | 0.0382 | 0.0681 | 0.0028 | IR sensitizing     |
| hsa-miR-95     | MI0000097 | UUCAACGGGAUUUAUUGAGCA       | 0.9062 | 0.0245 | 1.4136 | 0.1202 | —                  |

|              |           |                         |        |        |        |        |                |
|--------------|-----------|-------------------------|--------|--------|--------|--------|----------------|
| hsa-miR-96   | MI0000098 | UUUGGCACUAGCACAUUUUUGCU | 0.7501 | 0.0178 | 0.4100 | 0.0196 | IR sensitizing |
| hsa-miR-96*  | MI0000098 | AAUCAUGUGCAGUGCCAAUAUG  | 0.6279 | 0.0026 | 0.3646 | 0.0352 | IR sensitizing |
| hsa-miR-98   | MI0000100 | UGAGGUAGUAAGUUGUAUUGUU  | 0.7694 | 0.0314 | 0.4744 | 0.0755 | IR sensitizing |
| hsa-miR-99a  | MI0000101 | AACCCGUAGAUCCGAUCUUGUG  | 0.7978 | 0.0412 | 0.2253 | 0.0222 | IR sensitizing |
| hsa-miR-99a* | MI0000101 | CAAGCUCGCUUCUAUGGGUCUG  | 0.8450 | 0.0018 | 0.5779 | 0.1044 | —              |
| hsa-miR-99b  | MI0000746 | CACCCGUAGAACCGACCUUGCG  | 0.6616 | 0.0779 | 0.1692 | 0.0056 | IR sensitizing |
| hsa-miR-99b* | MI0000746 | CAAGCUCGUGUCUGGGUCCG    | 0.8627 | 0.0318 | 0.7699 | 0.2160 | —              |

**Supplementary Table 4.** Radiation sensitizing miRNAs predicted to target radiation sensitizing DDR pathway genes using *in silico* analysis, microRNA.org.

|             | DNAPK   | MAD2L2  | BRCA2   | NBN     | RAD23B  | RAD54L  |
|-------------|---------|---------|---------|---------|---------|---------|
| miR-890     |         | -0.5108 |         | -0.1413 | -0.0121 |         |
| miR-744-3p  |         |         | -0.1147 | -0.0084 | -0.7604 |         |
| miR-32-3p   |         |         | -0.1559 | -0.6390 | -0.0488 |         |
| miR-130b-5p | -0.0444 |         |         |         | -0.0029 | -0.4047 |

The highlighted cells corresponding to the miRNAs with a mirSVR score < -0.5.



**Supplementary Table 5.** Potential DDR pathway genes predicted to be targeted by miR-890 or miR-744-3p using *in silico* analysis, microRNA.org, and corresponding mirSVR scores.

| DDR pathway genes | miRNA      | mirSVR score |
|-------------------|------------|--------------|
| WEE1              | miR-890    | -1.1805      |
| XPC               | miR-890    | -0.9251      |
| MAD2L2            | miR-890    | -0.5108      |
| KU80              | miR-890    | -0.4843      |
| XLF               | miR-744-3p | -0.8632      |
| RAD23B            | miR-744-3p | -0.7604      |
| MCL1              | miR-744-3p | -0.6699      |
